# Supplementary material
Source: MDPI journal article supplement (https://www.mdpi.com/1424-2818/13/11/585)
Supplement: s1 [file s1]

## Supplementary Tables

**Table S1:** List of explanatory variables used to model favourability grouped according to climatic, geographical, and anthropic factors.

| Factor   | Code       | Variable                                                                             | Date      | Resolution        |
|----------|------------|--------------------------------------------------------------------------------------|-----------|-------------------|
|          | BIO 1      | Mean annual temperature <sup>(1)</sup>                                               | 1980-2009 | 1 km <sup>2</sup> |
|          | BIO 2      | Average diurnal interval (Mean monthly temperature (max. temp. min.)) <sup>(1)</sup> | 1980-2009 | 1 km <sup>2</sup> |
|          | BIO 3      | Isotherm (BIO2 / BIO7) (* 100) <sup>(1)</sup>                                        | 1980-2009 | 1 km <sup>2</sup> |
|          | BIO 4      | Temperature seasonality (standard deviation * 100) <sup>(1)</sup>                    | 1980-2009 | 1 km <sup>2</sup> |
|          | BIO 5      | Maximum temperature of the warmest month                                             | 1980-2009 | 1 km <sup>2</sup> |
|          | BIO 6      | Coldest month minimum temperature <sup>(1)</sup>                                     | 1980-2009 | 1 km <sup>2</sup> |
|          | BIO 7      | Temperature annual range (BIO5-BIO6) <sup>(1)</sup>                                  | 1980-2009 | 1 km <sup>2</sup> |
|          | BIO 8      | Mean temperature of the wettest quarter <sup>(1)</sup>                               | 1980-2009 | 1 km <sup>2</sup> |
|          | BIO 9      | Mean temperature of the driest quarter <sup>(1)</sup>                                | 1980-2009 | 1 km <sup>2</sup> |
|          | BIO 10     | Mean temperature of the warmest quarter <sup>(1)</sup>                               | 1980-2009 | 1 km <sup>2</sup> |
|          | BIO 11     | Mean temperature of the coldest quarter <sup>(1)</sup>                               | 1980-2009 | 1 km <sup>2</sup> |
|          | BIO 12     | Annual precipitation <sup>(1)</sup>                                                  | 1980-2009 | 1 km <sup>2</sup> |
| Climatic | BIO 13     | Precipitation of the wettest month <sup>(1)</sup>                                    | 1980-2009 | 1 km <sup>2</sup> |
|          | BIO 14     | Precipitation of the driest month <sup>(1)</sup>                                     | 1980-2009 | 1 km <sup>2</sup> |
|          | BIO 15     | Precipitation seasonality (Coefficient of variation) <sup>(1)</sup>                  | 1980-2009 | 1 km <sup>2</sup> |
|          | BIO 16     | Precipitation in the wettest quarter <sup>(1)</sup>                                  | 1980-2009 | 1 km <sup>2</sup> |
|          | BIO 17     | Precipitation in the driest quarter <sup>(1)</sup>                                   | 1980-2009 | 1 km <sup>2</sup> |
|          | BIO 18     | Precipitation in the warmest quarter <sup>(1)</sup>                                  | 1980-2009 | 1 km <sup>2</sup> |
|          | BIO 19     | Precipitation in the coldest quarter <sup>(1)</sup>                                  | 1980-2009 | 1 km <sup>2</sup> |
|          | PMAX_MED   | Mean maximum rainfall <sup>(1)</sup>                                                 | 1980-2009 | 1 km <sup>2</sup> |
|          | SOLAR_RAD  | Global mean solar radiation <sup>(2)</sup>                                           | 2010      | 1 km <sup>2</sup> |
|          | ETP        | Potential evapotranspiration <sup>(1)</sup>                                          | 1980-2009 | 1 km <sup>2</sup> |
|          | ETR        | Real evapotranspiration <sup>(1)</sup>                                               | 1980-2009 | 1 km <sup>2</sup> |
|          | HUM_MED_AN | Annual mean humidity <sup>(1)</sup>                                                  | 1980-2009 | 1 km <sup>2</sup> |
|          | HUM_TRIM_C | Humidity of the warmest quarter (January, February, March) <sup>(1)</sup>            | 1980-2009 | 1 km <sup>2</sup> |
|          | HUM_TRIM_F | Humidity of the coldest quarter (July, August, September) <sup>(1)</sup>             | 1980-2009 | 1 km <sup>2</sup> |
|          | FROST      | Annual mean of days with frost <sup>(1)</sup>                                        | 1980-2009 | 1 km <sup>2</sup> |
|          | SUMMER_WB  | Summer water balance <sup>(1)</sup>                                                  | 1980-2009 | 1 km <sup>2</sup> |
|          | AUTUMN_WB  | Autumn water balance <sup>(1)</sup>                                                  | 1980-2009 | 1 km <sup>2</sup> |
|          | WINTER_WB  | Winter water balance <sup>(1)</sup>                                                  | 1980-2009 | 1 km <sup>2</sup> |
|          | SPRING_WB  | Spring water balance <sup>(1)</sup>                                                  | 1980-2009 | 1 km <sup>2</sup> |
|          | ANNUAL_WB  | Mean annual water balance <sup>(1)</sup>                                             | 1980-2009 | 1 km <sup>2</sup> |
|          |            |                                                                                      |           |                   |

|                   |             |                                                                                 |      |                   |
|-------------------|-------------|---------------------------------------------------------------------------------|------|-------------------|
|                   | ROUGHNESS   | Roughness, height difference <sup>(3)</sup>                                     | 2018 | 1 km <sup>2</sup> |
|                   | SLOPE       | Percentage slope <sup>(3)</sup>                                                 | 2018 | 1 km <sup>2</sup> |
|                   | ALTITUDE    | Altitude in metres <sup>(3)</sup>                                               | 2018 | 1 km <sup>2</sup> |
|                   | ASPECT      | South or north orientation <sup>(3)</sup>                                       | 2018 | 1 km <sup>2</sup> |
|                   | DIST_RIV    | Distance to rivers <sup>(4)</sup>                                               | 2018 | 1 km <sup>2</sup> |
|                   | DIST_COAST  | Distance to the coast <sup>(5)</sup>                                            | 2018 | 1 km <sup>2</sup> |
| <b>Geographic</b> | NDVI        | Normalised Difference Vegetation Index <sup>(6)</sup>                           | 2018 | 1 km <sup>2</sup> |
|                   | PROF_SUELO  | Depth of soil <sup>(7)</sup>                                                    | 2018 | 1 km <sup>2</sup> |
|                   | TEXT_SUELO  | Soil texture <sup>(7)</sup>                                                     | 2018 | 1 km <sup>2</sup> |
|                   | ROC_SUELO   | Soil rockiness <sup>(7)</sup>                                                   | 2018 | 1 km <sup>2</sup> |
|                   | INUN_SUELO  | Soil inundation <sup>(7)</sup>                                                  | 2018 | 1 km <sup>2</sup> |
|                   | FOREST      | Percentage of area occupied by native forest <sup>(7)</sup>                     | 2018 | 1 km <sup>2</sup> |
|                   | WETLANDS    | Percentage of area occupied by wetlands <sup>(7)</sup>                          | 2018 | 1 km <sup>2</sup> |
|                   | NATGRASS    | Percentage of area occupied by natural grassland <sup>(7)</sup>                 | 2018 | 1 km <sup>2</sup> |
|                   | FORESTATION | Percentage of area under nonnative forestation <sup>(7)</sup>                   | 2018 | 1 km <sup>2</sup> |
|                   | CROPS       | Percentage of area occupied for agriculture and artificial field <sup>(7)</sup> | 2018 | 1 km <sup>2</sup> |
|                   | URBAN       | Percentage of urbanised area <sup>(7)</sup>                                     | 2018 | 1 km <sup>2</sup> |
|                   | DIST_URB    | Distance from urbanised zone <sup>(8)</sup>                                     | 2018 | 1 km <sup>2</sup> |
| <b>Anthropic</b>  | DIST_ROUT   | Distance to routes <sup>(8)</sup>                                               | 2018 | 1 km <sup>2</sup> |
|                   | DIST_ROAD   | Distance to roads <sup>(8)</sup>                                                | 2018 | 1 km <sup>2</sup> |
|                   | BRIDGES     | Intersections between roads and watercourses <sup>(8)</sup>                     | 2018 | 1 km <sup>2</sup> |
|                   | DENS_POP    | Population density <sup>(9)</sup>                                               | 2018 | 1 km <sup>2</sup> |
|                   | ROADS       | Roads in metres <sup>(8)</sup>                                                  | 2018 | 1 km <sup>2</sup> |
|                   | AADT        | Annual average daily traffic <sup>(10)</sup>                                    | 2017 | 1 km <sup>2</sup> |

Sources:

(1) Ceroni 2008 from DNM-INIA. Monthly data series of thirty years for Uruguay (from 1980 to 2009). The operations to calculate the bioclimatic variables (BIO1–BIO19) were based on the WorldClim. Global Climate Data available in Fick & Hijmans (2017).

(2) Available at [https://eva.fing.edu.uy/pluginfile.php/54560/mod\\_resource/content/1/Memoria-tecnica-Mapa\\_Solar\\_Uruguay-v1.pdf](https://eva.fing.edu.uy/pluginfile.php/54560/mod_resource/content/1/Memoria-tecnica-Mapa_Solar_Uruguay-v1.pdf)

(3) United States Geological Survey 1996. GTOPO30. Land Processes Distributed Active Archive Center. – EROS Data Center, <https://lta.cr.usgs.gov/GTOPO30>.

(4) United States Geological Survey 2006. HydroShed. Hydrological data and maps based on Shuttle Elevation Derivatives at multiple Scales. Disponible en: <http://hydrosheds.cr.usgs.gov/index.php/>

(5) It was generated from the QGIS ([www.qgis.org](http://www.qgis.org)) program calculating the average distance from the centroid of the grid to the coastline.

(6) <https://www.vito-eodata.be>, from SPOT-VEGETATION – S10 NDVI.

(7) Panario, D. & Gutiérrez, O. 2011. Mapa de ambientes: Cartografía implementada en un SIG. In: Mapa de Ambientes de Uruguay y Distribución potencial de especies, Convenio MGAP/PPR-CIEDUR, Montevideo.

(8) Ministry of Transportation and Public Infrastructure of Uruguay 2012.

(9) National Statistics Institute of Uruguay 2011

(10) Ministry of Transportation and Public Infrastructure of Uruguay 2017

**Table S2:** Records of roadkill obtained in the period 2015–2016 for the native bush and grassland species selected for this study.

| ID | Latitude   | Longitude  | Scientific name         | Common name | Database       |
|----|------------|------------|-------------------------|-------------|----------------|
| 1  | -34.681778 | -54.562361 | <i>Conepatus chinga</i> | Andes skunk | ECOBIO Uruguay |
| 2  | -34.677458 | -54.557031 | <i>Conepatus chinga</i> | Andes skunk | ECOBIO Uruguay |
| 3  | -34.671861 | -54.549972 | <i>Conepatus chinga</i> | Andes skunk | ECOBIO Uruguay |
| 4  | -34.671800 | -54.549977 | <i>Conepatus chinga</i> | Andes skunk | ECOBIO Uruguay |
| 5  | -34.662276 | -54.537521 | <i>Conepatus chinga</i> | Andes skunk | ECOBIO Uruguay |
| 6  | -34.648056 | -54.514389 | <i>Conepatus chinga</i> | Andes skunk | ECOBIO Uruguay |
| 7  | -34.648002 | -54.514453 | <i>Conepatus chinga</i> | Andes skunk | ECOBIO Uruguay |
| 8  | -34.633333 | -54.466667 | <i>Conepatus chinga</i> | Andes skunk | ECOBIO Uruguay |
| 9  | -34.631504 | -54.467816 | <i>Conepatus chinga</i> | Andes skunk | ECOBIO Uruguay |
| 10 | -34.611917 | -54.440694 | <i>Conepatus chinga</i> | Andes skunk | ECOBIO Uruguay |
| 11 | -34.603783 | -54.428194 | <i>Conepatus chinga</i> | Andes skunk | ECOBIO Uruguay |
| 12 | -34.603782 | -54.428215 | <i>Conepatus chinga</i> | Andes skunk | ECOBIO Uruguay |
| 13 | -34.603521 | -54.427769 | <i>Conepatus chinga</i> | Andes skunk | ECOBIO Uruguay |
| 14 | -34.599830 | -54.422044 | <i>Conepatus chinga</i> | Andes skunk | ECOBIO Uruguay |
| 15 | -34.598833 | -54.177167 | <i>Conepatus chinga</i> | Andes skunk | ECOBIO Uruguay |
| 16 | -34.596972 | -54.177361 | <i>Conepatus chinga</i> | Andes skunk | ECOBIO Uruguay |
| 17 | -34.590661 | -54.410791 | <i>Conepatus chinga</i> | Andes skunk | ECOBIO Uruguay |
| 18 | -34.587306 | -54.178833 | <i>Conepatus chinga</i> | Andes skunk | ECOBIO Uruguay |
| 19 | -34.577722 | -54.182500 | <i>Conepatus chinga</i> | Andes skunk | ECOBIO Uruguay |
| 20 | -34.576909 | -54.182999 | <i>Conepatus chinga</i> | Andes skunk | ECOBIO Uruguay |
| 21 | -34.573750 | -54.185056 | <i>Conepatus chinga</i> | Andes skunk | ECOBIO Uruguay |
| 22 | -34.571417 | -54.397167 | <i>Conepatus chinga</i> | Andes skunk | ECOBIO Uruguay |
| 23 | -34.571417 | -54.397167 | <i>Conepatus chinga</i> | Andes skunk | ECOBIO Uruguay |
| 24 | -34.571167 | -54.396972 | <i>Conepatus chinga</i> | Andes skunk | ECOBIO Uruguay |
| 25 | -34.552778 | -54.198139 | <i>Conepatus chinga</i> | Andes skunk | ECOBIO Uruguay |
| 26 | -34.561050 | -54.192100 | <i>Conepatus chinga</i> | Andes skunk | ECOBIO Uruguay |
| 27 | -34.536833 | -54.375250 | <i>Conepatus chinga</i> | Andes skunk | ECOBIO Uruguay |
| 28 | -34.526664 | -54.359605 | <i>Conepatus chinga</i> | Andes skunk | ECOBIO Uruguay |
| 29 | -34.525778 | -54.355750 | <i>Conepatus chinga</i> | Andes skunk | ECOBIO Uruguay |
| 30 | -34.525694 | -54.355556 | <i>Conepatus chinga</i> | Andes skunk | ECOBIO Uruguay |
| 31 | -34.519889 | -54.237194 | <i>Conepatus chinga</i> | Andes skunk | ECOBIO Uruguay |
| 32 | -34.518669 | -54.238605 | <i>Conepatus chinga</i> | Andes skunk | ECOBIO Uruguay |
| 33 | -34.518611 | -54.290639 | <i>Conepatus chinga</i> | Andes skunk | ECOBIO Uruguay |
| 34 | -34.516639 | -54.267833 | <i>Conepatus chinga</i> | Andes skunk | ECOBIO Uruguay |
| 35 | -34.514472 | -54.296083 | <i>Conepatus chinga</i> | Andes skunk | ECOBIO Uruguay |
| 36 | -34.471174 | -54.252724 | <i>Conepatus chinga</i> | Andes skunk | ECOBIO Uruguay |
| 37 | -34.427897 | -54.153825 | <i>Conepatus chinga</i> | Andes skunk | ECOBIO Uruguay |
| 38 | -34.422561 | -54.146755 | <i>Conepatus chinga</i> | Andes skunk | ECOBIO Uruguay |
| 39 | -34.416033 | -54.289351 | <i>Conepatus chinga</i> | Andes skunk | ECOBIO Uruguay |
| 40 | -34.407637 | -54.126633 | <i>Conepatus chinga</i> | Andes skunk | ECOBIO Uruguay |
| 41 | -34.398060 | -54.285120 | <i>Conepatus chinga</i> | Andes skunk | ECOBIO Uruguay |

|    |            |            |                         |             |                |
|----|------------|------------|-------------------------|-------------|----------------|
| 42 | -34.370862 | -54.079170 | <i>Conepatus chinga</i> | Andes skunk | ECOBIO Uruguay |
| 43 | -34.370222 | -54.078526 | <i>Conepatus chinga</i> | Andes skunk | ECOBIO Uruguay |
| 44 | -34.350955 | -54.057892 | <i>Conepatus chinga</i> | Andes skunk | ECOBIO Uruguay |
| 45 | -34.319327 | -53.828330 | <i>Conepatus chinga</i> | Andes skunk | ECOBIO Uruguay |
| 46 | -34.302918 | -54.024301 | <i>Conepatus chinga</i> | Andes skunk | ECOBIO Uruguay |
| 47 | -34.240496 | -53.980997 | <i>Conepatus chinga</i> | Andes skunk | ECOBIO Uruguay |
| 48 | -34.229830 | -53.969514 | <i>Conepatus chinga</i> | Andes skunk | ECOBIO Uruguay |
| 49 | -34.212154 | -53.912802 | <i>Conepatus chinga</i> | Andes skunk | ECOBIO Uruguay |
| 50 | -34.207118 | -53.888768 | <i>Conepatus chinga</i> | Andes skunk | ECOBIO Uruguay |
| 51 | -34.198525 | -53.797990 | <i>Conepatus chinga</i> | Andes skunk | ECOBIO Uruguay |
| 52 | -34.195844 | -53.767931 | <i>Conepatus chinga</i> | Andes skunk | ECOBIO Uruguay |
| 53 | -34.187196 | -53.756694 | <i>Conepatus chinga</i> | Andes skunk | ECOBIO Uruguay |
| 54 | -34.180125 | -53.750674 | <i>Conepatus chinga</i> | Andes skunk | ECOBIO Uruguay |
| 55 | -34.161002 | -54.290507 | <i>Conepatus chinga</i> | Andes skunk | ECOBIO Uruguay |
| 56 | -34.158918 | -54.289734 | <i>Conepatus chinga</i> | Andes skunk | ECOBIO Uruguay |
| 57 | -34.156519 | -54.288813 | <i>Conepatus chinga</i> | Andes skunk | ECOBIO Uruguay |
| 58 | -34.150229 | -53.716296 | <i>Conepatus chinga</i> | Andes skunk | ECOBIO Uruguay |
| 59 | -34.134415 | -54.285212 | <i>Conepatus chinga</i> | Andes skunk | ECOBIO Uruguay |
| 60 | -34.120281 | -53.676256 | <i>Conepatus chinga</i> | Andes skunk | ECOBIO Uruguay |
| 61 | -34.109707 | -54.284616 | <i>Conepatus chinga</i> | Andes skunk | ECOBIO Uruguay |
| 62 | -34.103916 | -53.659946 | <i>Conepatus chinga</i> | Andes skunk | ECOBIO Uruguay |
| 63 | -34.099780 | -53.654788 | <i>Conepatus chinga</i> | Andes skunk | ECOBIO Uruguay |
| 64 | -34.083595 | -53.640251 | <i>Conepatus chinga</i> | Andes skunk | ECOBIO Uruguay |
| 65 | -34.029983 | -54.282210 | <i>Conepatus chinga</i> | Andes skunk | ECOBIO Uruguay |
| 66 | -34.023033 | -54.292797 | <i>Conepatus chinga</i> | Andes skunk | ECOBIO Uruguay |
| 67 | -34.002437 | -54.319182 | <i>Conepatus chinga</i> | Andes skunk | ECOBIO Uruguay |
| 68 | -34.001454 | -53.570878 | <i>Conepatus chinga</i> | Andes skunk | ECOBIO Uruguay |
| 69 | -33.969557 | -54.328448 | <i>Conepatus chinga</i> | Andes skunk | ECOBIO Uruguay |
| 70 | -33.951126 | -53.546260 | <i>Conepatus chinga</i> | Andes skunk | ECOBIO Uruguay |
| 71 | -33.945099 | -53.543641 | <i>Conepatus chinga</i> | Andes skunk | ECOBIO Uruguay |
| 72 | -33.932956 | -53.538534 | <i>Conepatus chinga</i> | Andes skunk | ECOBIO Uruguay |
| 73 | -33.928155 | -53.536430 | <i>Conepatus chinga</i> | Andes skunk | ECOBIO Uruguay |
| 74 | -33.881228 | -53.524198 | <i>Conepatus chinga</i> | Andes skunk | ECOBIO Uruguay |
| 75 | -33.867531 | -53.521983 | <i>Conepatus chinga</i> | Andes skunk | ECOBIO Uruguay |
| 76 | -33.857727 | -53.519784 | <i>Conepatus chinga</i> | Andes skunk | ECOBIO Uruguay |
| 77 | -33.845916 | -53.517231 | <i>Conepatus chinga</i> | Andes skunk | ECOBIO Uruguay |
| 78 | -33.819511 | -53.508986 | <i>Conepatus chinga</i> | Andes skunk | ECOBIO Uruguay |
| 79 | -33.817460 | -53.508072 | <i>Conepatus chinga</i> | Andes skunk | ECOBIO Uruguay |
| 80 | -33.813976 | -53.506578 | <i>Conepatus chinga</i> | Andes skunk | ECOBIO Uruguay |
| 81 | -33.802164 | -53.501486 | <i>Conepatus chinga</i> | Andes skunk | ECOBIO Uruguay |
| 82 | -33.794929 | -54.286131 | <i>Conepatus chinga</i> | Andes skunk | ECOBIO Uruguay |
| 83 | -33.772545 | -54.285454 | <i>Conepatus chinga</i> | Andes skunk | ECOBIO Uruguay |
| 84 | -33.771474 | -54.285433 | <i>Conepatus chinga</i> | Andes skunk | ECOBIO Uruguay |
| 85 | -33.736165 | -53.473011 | <i>Conepatus chinga</i> | Andes skunk | ECOBIO Uruguay |
| 86 | -33.722657 | -54.260853 | <i>Conepatus chinga</i> | Andes skunk | ECOBIO Uruguay |

|     |            |            |                         |             |                |
|-----|------------|------------|-------------------------|-------------|----------------|
| 87  | -33.712086 | -54.238099 | <i>Conepatus chinga</i> | Andes skunk | ECOBIO Uruguay |
| 88  | -33.685262 | -54.216578 | <i>Conepatus chinga</i> | Andes skunk | ECOBIO Uruguay |
| 89  | -33.667053 | -54.213702 | <i>Conepatus chinga</i> | Andes skunk | ECOBIO Uruguay |
| 90  | -33.545069 | -53.985272 | <i>Conepatus chinga</i> | Andes skunk | ECOBIO Uruguay |
| 91  | -33.524086 | -53.909086 | <i>Conepatus chinga</i> | Andes skunk | ECOBIO Uruguay |
| 92  | -33.522340 | -54.567220 | <i>Conepatus chinga</i> | Andes skunk | ECOBIO Uruguay |
| 93  | -33.517312 | -53.896671 | <i>Conepatus chinga</i> | Andes skunk | ECOBIO Uruguay |
| 94  | -33.500410 | -54.547050 | <i>Conepatus chinga</i> | Andes skunk | ECOBIO Uruguay |
| 95  | -33.430659 | -54.521096 | <i>Conepatus chinga</i> | Andes skunk | ECOBIO Uruguay |
| 96  | -33.424147 | -54.518753 | <i>Conepatus chinga</i> | Andes skunk | ECOBIO Uruguay |
| 97  | -33.484730 | -54.540430 | <i>Conepatus chinga</i> | Andes skunk | ECOBIO Uruguay |
| 98  | -33.413282 | -54.515606 | <i>Conepatus chinga</i> | Andes skunk | ECOBIO Uruguay |
| 99  | -33.413102 | -54.515530 | <i>Conepatus chinga</i> | Andes skunk | ECOBIO Uruguay |
| 100 | -33.413064 | -54.515416 | <i>Conepatus chinga</i> | Andes skunk | ECOBIO Uruguay |
| 101 | -33.400486 | -54.510921 | <i>Conepatus chinga</i> | Andes skunk | ECOBIO Uruguay |
| 102 | -33.399535 | -53.865121 | <i>Conepatus chinga</i> | Andes skunk | ECOBIO Uruguay |
| 103 | -33.393445 | -54.508312 | <i>Conepatus chinga</i> | Andes skunk | ECOBIO Uruguay |
| 104 | -33.391570 | -54.508130 | <i>Conepatus chinga</i> | Andes skunk | ECOBIO Uruguay |
| 105 | -33.382588 | -53.863406 | <i>Conepatus chinga</i> | Andes skunk | ECOBIO Uruguay |
| 106 | -33.356114 | -53.855154 | <i>Conepatus chinga</i> | Andes skunk | ECOBIO Uruguay |
| 107 | -33.306265 | -54.457190 | <i>Conepatus chinga</i> | Andes skunk | ECOBIO Uruguay |
| 108 | -33.291135 | -54.447466 | <i>Conepatus chinga</i> | Andes skunk | ECOBIO Uruguay |
| 109 | -34.645583 | -54.510582 | <i>Conepatus chinga</i> | Andes skunk | ECOBIO Uruguay |
| 110 | -34.469601 | -54.247560 | <i>Conepatus chinga</i> | Andes skunk | ECOBIO Uruguay |
| 111 | -34.207260 | -53.889368 | <i>Conepatus chinga</i> | Andes skunk | ECOBIO Uruguay |
| 112 | -34.598194 | -54.419528 | <i>Conepatus chinga</i> | Andes skunk | ECOBIO Uruguay |
| 113 | -34.519306 | -54.282194 | <i>Conepatus chinga</i> | Andes skunk | ECOBIO Uruguay |
| 114 | -34.544861 | -54.207389 | <i>Conepatus chinga</i> | Andes skunk | ECOBIO Uruguay |
| 115 | -34.571944 | -54.397667 | <i>Conepatus chinga</i> | Andes skunk | ECOBIO Uruguay |
| 116 | -34.596278 | -54.177361 | <i>Conepatus chinga</i> | Andes skunk | ECOBIO Uruguay |
| 117 | -33.532743 | -54.576465 | <i>Conepatus chinga</i> | Andes skunk | ECOBIO Uruguay |
| 118 | -33.498574 | -54.546518 | <i>Conepatus chinga</i> | Andes skunk | ECOBIO Uruguay |
| 119 | -33.497400 | -54.546105 | <i>Conepatus chinga</i> | Andes skunk | ECOBIO Uruguay |
| 120 | -33.488440 | -54.542953 | <i>Conepatus chinga</i> | Andes skunk | ECOBIO Uruguay |
| 121 | -33.531913 | -54.575779 | <i>Conepatus chinga</i> | Andes skunk | ECOBIO Uruguay |
| 122 | -33.421133 | -54.517926 | <i>Conepatus chinga</i> | Andes skunk | ECOBIO Uruguay |
| 123 | -34.456987 | -54.207008 | <i>Conepatus chinga</i> | Andes skunk | ECOBIO Uruguay |
| 124 | -34.431853 | -54.159104 | <i>Conepatus chinga</i> | Andes skunk | ECOBIO Uruguay |
| 125 | -34.394100 | -54.107751 | <i>Conepatus chinga</i> | Andes skunk | ECOBIO Uruguay |
| 126 | -34.194851 | -53.837064 | <i>Conepatus chinga</i> | Andes skunk | ECOBIO Uruguay |
| 127 | -34.197110 | -53.805006 | <i>Conepatus chinga</i> | Andes skunk | ECOBIO Uruguay |
| 128 | -33.919803 | -53.532627 | <i>Conepatus chinga</i> | Andes skunk | ECOBIO Uruguay |
| 129 | -34.526107 | -54.356785 | <i>Conepatus chinga</i> | Andes skunk | ECOBIO Uruguay |
| 130 | -34.536555 | -54.375107 | <i>Conepatus chinga</i> | Andes skunk | ECOBIO Uruguay |
| 131 | -34.619363 | -54.448944 | <i>Conepatus chinga</i> | Andes skunk | ECOBIO Uruguay |

|     |            |            |                         |             |                |
|-----|------------|------------|-------------------------|-------------|----------------|
| 132 | -34.538470 | -54.376152 | <i>Conepatus chinga</i> | Andes skunk | ECOBIO Uruguay |
| 133 | -34.642100 | -54.500232 | <i>Conepatus chinga</i> | Andes skunk | ECOBIO Uruguay |
| 134 | -33.436600 | -54.523073 | <i>Conepatus chinga</i> | Andes skunk | ECOBIO Uruguay |
| 135 | -33.312931 | -54.460689 | <i>Conepatus chinga</i> | Andes skunk | ECOBIO Uruguay |
| 136 | -33.158648 | -54.385614 | <i>Conepatus chinga</i> | Andes skunk | ECOBIO Uruguay |
| 137 | -34.689456 | -54.568710 | <i>Conepatus chinga</i> | Andes skunk | ECOBIO Uruguay |
| 138 | -34.630078 | -54.465548 | <i>Conepatus chinga</i> | Andes skunk | ECOBIO Uruguay |
| 139 | -34.515891 | -54.345430 | <i>Conepatus chinga</i> | Andes skunk | ECOBIO Uruguay |
| 140 | -33.419401 | -54.517181 | <i>Conepatus chinga</i> | Andes skunk | ECOBIO Uruguay |
| 141 | -34.198204 | -54.935741 | <i>Conepatus chinga</i> | Andes skunk | ECOBIO Uruguay |
| 142 | -33.860539 | -54.765846 | <i>Conepatus chinga</i> | Andes skunk | ECOBIO Uruguay |
| 143 | -33.852117 | -54.765053 | <i>Conepatus chinga</i> | Andes skunk | ECOBIO Uruguay |
| 144 | -34.391881 | -55.286953 | <i>Conepatus chinga</i> | Andes skunk | ECOBIO Uruguay |
| 145 | -34.391651 | -55.286583 | <i>Conepatus chinga</i> | Andes skunk | ECOBIO Uruguay |
| 146 | -34.390459 | -55.284252 | <i>Conepatus chinga</i> | Andes skunk | ECOBIO Uruguay |
| 147 | -34.364472 | -55.175889 | <i>Conepatus chinga</i> | Andes skunk | ECOBIO Uruguay |
| 148 | -34.355531 | -55.141534 | <i>Conepatus chinga</i> | Andes skunk | ECOBIO Uruguay |
| 149 | -34.351611 | -55.166917 | <i>Conepatus chinga</i> | Andes skunk | ECOBIO Uruguay |
| 150 | -34.337395 | -55.090692 | <i>Conepatus chinga</i> | Andes skunk | ECOBIO Uruguay |
| 151 | -34.337361 | -55.090611 | <i>Conepatus chinga</i> | Andes skunk | ECOBIO Uruguay |
| 152 | -34.335228 | -55.080374 | <i>Conepatus chinga</i> | Andes skunk | ECOBIO Uruguay |
| 153 | -34.328417 | -55.065167 | <i>Conepatus chinga</i> | Andes skunk | ECOBIO Uruguay |
| 154 | -34.328342 | -55.065034 | <i>Conepatus chinga</i> | Andes skunk | ECOBIO Uruguay |
| 155 | -34.313583 | -55.016639 | <i>Conepatus chinga</i> | Andes skunk | ECOBIO Uruguay |
| 156 | -34.292136 | -54.989888 | <i>Conepatus chinga</i> | Andes skunk | ECOBIO Uruguay |
| 157 | -34.265556 | -54.960222 | <i>Conepatus chinga</i> | Andes skunk | ECOBIO Uruguay |
| 158 | -34.263778 | -54.958944 | <i>Conepatus chinga</i> | Andes skunk | ECOBIO Uruguay |
| 159 | -34.259623 | -54.955301 | <i>Conepatus chinga</i> | Andes skunk | ECOBIO Uruguay |
| 160 | -34.197791 | -54.935636 | <i>Conepatus chinga</i> | Andes skunk | ECOBIO Uruguay |
| 161 | -34.180347 | -54.925044 | <i>Conepatus chinga</i> | Andes skunk | ECOBIO Uruguay |
| 162 | -34.161155 | -54.906352 | <i>Conepatus chinga</i> | Andes skunk | ECOBIO Uruguay |
| 163 | -34.155162 | -54.901380 | <i>Conepatus chinga</i> | Andes skunk | ECOBIO Uruguay |
| 164 | -34.143738 | -54.884037 | <i>Conepatus chinga</i> | Andes skunk | ECOBIO Uruguay |
| 165 | -34.139449 | -54.863291 | <i>Conepatus chinga</i> | Andes skunk | ECOBIO Uruguay |
| 166 | -33.951301 | -54.788353 | <i>Conepatus chinga</i> | Andes skunk | ECOBIO Uruguay |
| 167 | -33.949785 | -54.788019 | <i>Conepatus chinga</i> | Andes skunk | ECOBIO Uruguay |
| 168 | -33.942056 | -54.784972 | <i>Conepatus chinga</i> | Andes skunk | ECOBIO Uruguay |
| 169 | -33.881207 | -54.765706 | <i>Conepatus chinga</i> | Andes skunk | ECOBIO Uruguay |
| 170 | -33.854361 | -54.765222 | <i>Conepatus chinga</i> | Andes skunk | ECOBIO Uruguay |
| 171 | -33.841321 | -54.765989 | <i>Conepatus chinga</i> | Andes skunk | ECOBIO Uruguay |
| 172 | -33.831050 | -54.768030 | <i>Conepatus chinga</i> | Andes skunk | ECOBIO Uruguay |
| 173 | -33.830960 | -54.767940 | <i>Conepatus chinga</i> | Andes skunk | ECOBIO Uruguay |
| 174 | -33.830365 | -54.767902 | <i>Conepatus chinga</i> | Andes skunk | ECOBIO Uruguay |
| 175 | -33.829829 | -54.768727 | <i>Conepatus chinga</i> | Andes skunk | ECOBIO Uruguay |
| 176 | -33.824290 | -54.772420 | <i>Conepatus chinga</i> | Andes skunk | ECOBIO Uruguay |

|     |            |            |                         |             |                |
|-----|------------|------------|-------------------------|-------------|----------------|
| 177 | -33.809770 | -54.771700 | <i>Conepatus chinga</i> | Andes skunk | ECOBIO Uruguay |
| 178 | -33.809730 | -54.771710 | <i>Conepatus chinga</i> | Andes skunk | ECOBIO Uruguay |
| 179 | -33.800167 | -54.769528 | <i>Conepatus chinga</i> | Andes skunk | ECOBIO Uruguay |
| 180 | -33.780650 | -54.764180 | <i>Conepatus chinga</i> | Andes skunk | ECOBIO Uruguay |
| 181 | -33.734140 | -54.745580 | <i>Conepatus chinga</i> | Andes skunk | ECOBIO Uruguay |
| 182 | -33.732630 | -54.743750 | <i>Conepatus chinga</i> | Andes skunk | ECOBIO Uruguay |
| 183 | -33.718155 | -54.723848 | <i>Conepatus chinga</i> | Andes skunk | ECOBIO Uruguay |
| 184 | -33.678260 | -54.669330 | <i>Conepatus chinga</i> | Andes skunk | ECOBIO Uruguay |
| 185 | -33.656290 | -54.639210 | <i>Conepatus chinga</i> | Andes skunk | ECOBIO Uruguay |
| 186 | -33.651855 | -54.633191 | <i>Conepatus chinga</i> | Andes skunk | ECOBIO Uruguay |
| 187 | -33.649899 | -54.630790 | <i>Conepatus chinga</i> | Andes skunk | ECOBIO Uruguay |
| 188 | -33.649681 | -54.630573 | <i>Conepatus chinga</i> | Andes skunk | ECOBIO Uruguay |
| 189 | -33.648260 | -54.629250 | <i>Conepatus chinga</i> | Andes skunk | ECOBIO Uruguay |
| 190 | -33.646259 | -54.627601 | <i>Conepatus chinga</i> | Andes skunk | ECOBIO Uruguay |
| 191 | -33.621195 | -54.606499 | <i>Conepatus chinga</i> | Andes skunk | ECOBIO Uruguay |
| 192 | -33.617650 | -54.603390 | <i>Conepatus chinga</i> | Andes skunk | ECOBIO Uruguay |
| 193 | -33.597560 | -54.591590 | <i>Conepatus chinga</i> | Andes skunk | ECOBIO Uruguay |
| 194 | -33.590160 | -54.590460 | <i>Conepatus chinga</i> | Andes skunk | ECOBIO Uruguay |
| 195 | -33.572926 | -54.587883 | <i>Conepatus chinga</i> | Andes skunk | ECOBIO Uruguay |
| 196 | -33.553895 | -54.584897 | <i>Conepatus chinga</i> | Andes skunk | ECOBIO Uruguay |
| 197 | -33.553532 | -54.584773 | <i>Conepatus chinga</i> | Andes skunk | ECOBIO Uruguay |
| 198 | -33.550910 | -54.583980 | <i>Conepatus chinga</i> | Andes skunk | ECOBIO Uruguay |
| 199 | -33.541260 | -54.580920 | <i>Conepatus chinga</i> | Andes skunk | ECOBIO Uruguay |
| 200 | -33.539042 | -54.580121 | <i>Conepatus chinga</i> | Andes skunk | ECOBIO Uruguay |
| 201 | -33.535441 | -54.578603 | <i>Conepatus chinga</i> | Andes skunk | ECOBIO Uruguay |
| 202 | -33.535015 | -54.578330 | <i>Conepatus chinga</i> | Andes skunk | ECOBIO Uruguay |
| 203 | -33.534651 | -54.578147 | <i>Conepatus chinga</i> | Andes skunk | ECOBIO Uruguay |
| 204 | -33.533762 | -54.577444 | <i>Conepatus chinga</i> | Andes skunk | ECOBIO Uruguay |
| 205 | -34.364422 | -55.175702 | <i>Conepatus chinga</i> | Andes skunk | ECOBIO Uruguay |
| 206 | -34.359408 | -55.157330 | <i>Conepatus chinga</i> | Andes skunk | ECOBIO Uruguay |
| 207 | -34.326553 | -55.062001 | <i>Conepatus chinga</i> | Andes skunk | ECOBIO Uruguay |
| 208 | -34.161605 | -54.906837 | <i>Conepatus chinga</i> | Andes skunk | ECOBIO Uruguay |
| 209 | -34.116786 | -54.824432 | <i>Conepatus chinga</i> | Andes skunk | ECOBIO Uruguay |
| 210 | -34.009022 | -54.782581 | <i>Conepatus chinga</i> | Andes skunk | ECOBIO Uruguay |
| 211 | -33.881280 | -54.765697 | <i>Conepatus chinga</i> | Andes skunk | ECOBIO Uruguay |
| 212 | -33.640291 | -54.622494 | <i>Conepatus chinga</i> | Andes skunk | ECOBIO Uruguay |
| 213 | -33.560879 | -54.586056 | <i>Conepatus chinga</i> | Andes skunk | ECOBIO Uruguay |
| 214 | -33.672168 | -54.660921 | <i>Conepatus chinga</i> | Andes skunk | ECOBIO Uruguay |
| 215 | -33.695419 | -54.692728 | <i>Conepatus chinga</i> | Andes skunk | ECOBIO Uruguay |
| 216 | -33.703389 | -54.703669 | <i>Conepatus chinga</i> | Andes skunk | ECOBIO Uruguay |
| 217 | -33.938412 | -54.783501 | <i>Conepatus chinga</i> | Andes skunk | ECOBIO Uruguay |
| 218 | -34.132345 | -54.838313 | <i>Conepatus chinga</i> | Andes skunk | ECOBIO Uruguay |
| 219 | -34.163324 | -54.908531 | <i>Conepatus chinga</i> | Andes skunk | ECOBIO Uruguay |
| 220 | -34.176359 | -54.920863 | <i>Conepatus chinga</i> | Andes skunk | ECOBIO Uruguay |
| 221 | -34.286841 | -54.981141 | <i>Conepatus chinga</i> | Andes skunk | ECOBIO Uruguay |

|     |            |            |                         |             |                |
|-----|------------|------------|-------------------------|-------------|----------------|
| 222 | -34.361790 | -55.161780 | <i>Conepatus chinga</i> | Andes skunk | ECOBIO Uruguay |
| 223 | -34.337260 | -55.086953 | <i>Conepatus chinga</i> | Andes skunk | ECOBIO Uruguay |
| 224 | -34.127508 | -54.828093 | <i>Conepatus chinga</i> | Andes skunk | ECOBIO Uruguay |
| 225 | -34.116084 | -54.824310 | <i>Conepatus chinga</i> | Andes skunk | ECOBIO Uruguay |
| 226 | -34.073357 | -54.793251 | <i>Conepatus chinga</i> | Andes skunk | ECOBIO Uruguay |
| 227 | -34.065405 | -54.787112 | <i>Conepatus chinga</i> | Andes skunk | ECOBIO Uruguay |
| 228 | -34.030139 | -54.782491 | <i>Conepatus chinga</i> | Andes skunk | ECOBIO Uruguay |
| 229 | -33.699680 | -54.698520 | <i>Conepatus chinga</i> | Andes skunk | ECOBIO Uruguay |
| 230 | -33.545455 | -54.582287 | <i>Conepatus chinga</i> | Andes skunk | ECOBIO Uruguay |
| 231 | -33.640897 | -54.623093 | <i>Conepatus chinga</i> | Andes skunk | ECOBIO Uruguay |
| 232 | -33.695387 | -54.692732 | <i>Conepatus chinga</i> | Andes skunk | ECOBIO Uruguay |
| 233 | -33.703134 | -54.703355 | <i>Conepatus chinga</i> | Andes skunk | ECOBIO Uruguay |
| 234 | -33.988819 | -54.781511 | <i>Conepatus chinga</i> | Andes skunk | ECOBIO Uruguay |
| 235 | -34.214688 | -54.939337 | <i>Conepatus chinga</i> | Andes skunk | ECOBIO Uruguay |
| 236 | -34.162696 | -54.907841 | <i>Conepatus chinga</i> | Andes skunk | ECOBIO Uruguay |
| 237 | -33.736368 | -54.748799 | <i>Conepatus chinga</i> | Andes skunk | ECOBIO Uruguay |
| 238 | -33.619696 | -54.605142 | <i>Conepatus chinga</i> | Andes skunk | ECOBIO Uruguay |
| 239 | -33.600650 | -54.592062 | <i>Conepatus chinga</i> | Andes skunk | ECOBIO Uruguay |
| 240 | -33.778847 | -54.763677 | <i>Conepatus chinga</i> | Andes skunk | ECOBIO Uruguay |
| 241 | -33.876494 | -54.765557 | <i>Conepatus chinga</i> | Andes skunk | ECOBIO Uruguay |
| 242 | -34.205840 | -54.937324 | <i>Conepatus chinga</i> | Andes skunk | ECOBIO Uruguay |
| 243 | -34.356766 | -55.146161 | <i>Conepatus chinga</i> | Andes skunk | ECOBIO Uruguay |
| 244 | -34.364523 | -55.176552 | <i>Conepatus chinga</i> | Andes skunk | ECOBIO Uruguay |
| 245 | -34.789185 | -55.297289 | <i>Conepatus chinga</i> | Andes skunk | ECOBIO Uruguay |
| 246 | -34.786975 | -55.284431 | <i>Conepatus chinga</i> | Andes skunk | ECOBIO Uruguay |
| 247 | -34.786236 | -55.267866 | <i>Conepatus chinga</i> | Andes skunk | ECOBIO Uruguay |
| 248 | -34.788390 | -55.294050 | <i>Conepatus chinga</i> | Andes skunk | ECOBIO Uruguay |
| 249 | -34.782583 | -54.839611 | <i>Conepatus chinga</i> | Andes skunk | ECOBIO Uruguay |
| 250 | -34.782583 | -54.841917 | <i>Conepatus chinga</i> | Andes skunk | ECOBIO Uruguay |
| 251 | -34.782550 | -54.839676 | <i>Conepatus chinga</i> | Andes skunk | ECOBIO Uruguay |
| 252 | -34.781685 | -54.816434 | <i>Conepatus chinga</i> | Andes skunk | ECOBIO Uruguay |
| 253 | -34.781472 | -54.810944 | <i>Conepatus chinga</i> | Andes skunk | ECOBIO Uruguay |
| 254 | -34.779333 | -55.182056 | <i>Conepatus chinga</i> | Andes skunk | ECOBIO Uruguay |
| 255 | -34.778722 | -55.186167 | <i>Conepatus chinga</i> | Andes skunk | ECOBIO Uruguay |
| 256 | -34.776203 | -54.793858 | <i>Conepatus chinga</i> | Andes skunk | ECOBIO Uruguay |
| 257 | -34.772806 | -55.167361 | <i>Conepatus chinga</i> | Andes skunk | ECOBIO Uruguay |
| 258 | -34.765850 | -54.770082 | <i>Conepatus chinga</i> | Andes skunk | ECOBIO Uruguay |
| 259 | -34.759753 | -54.745396 | <i>Conepatus chinga</i> | Andes skunk | ECOBIO Uruguay |
| 260 | -34.759473 | -55.126825 | <i>Conepatus chinga</i> | Andes skunk | ECOBIO Uruguay |
| 261 | -34.758535 | -54.738933 | <i>Conepatus chinga</i> | Andes skunk | ECOBIO Uruguay |
| 262 | -34.756826 | -54.728959 | <i>Conepatus chinga</i> | Andes skunk | ECOBIO Uruguay |
| 263 | -34.756770 | -54.728758 | <i>Conepatus chinga</i> | Andes skunk | ECOBIO Uruguay |
| 264 | -34.754964 | -54.716482 | <i>Conepatus chinga</i> | Andes skunk | ECOBIO Uruguay |
| 265 | -34.754944 | -54.715639 | <i>Conepatus chinga</i> | Andes skunk | ECOBIO Uruguay |
| 266 | -34.755320 | -54.708530 | <i>Conepatus chinga</i> | Andes skunk | ECOBIO Uruguay |

|     |            |            |                         |             |                |
|-----|------------|------------|-------------------------|-------------|----------------|
| 267 | -34.750500 | -55.102917 | <i>Conepatus chinga</i> | Andes skunk | ECOBIO Uruguay |
| 268 | -34.743390 | -54.974128 | <i>Conepatus chinga</i> | Andes skunk | ECOBIO Uruguay |
| 269 | -34.743258 | -54.974669 | <i>Conepatus chinga</i> | Andes skunk | ECOBIO Uruguay |
| 270 | -34.743250 | -54.974639 | <i>Conepatus chinga</i> | Andes skunk | ECOBIO Uruguay |
| 271 | -34.737920 | -55.073936 | <i>Conepatus chinga</i> | Andes skunk | ECOBIO Uruguay |
| 272 | -34.731917 | -54.619878 | <i>Conepatus chinga</i> | Andes skunk | ECOBIO Uruguay |
| 273 | -34.755980 | -54.683380 | <i>Conepatus chinga</i> | Andes skunk | ECOBIO Uruguay |
| 274 | -34.713556 | -54.602472 | <i>Conepatus chinga</i> | Andes skunk | ECOBIO Uruguay |
| 275 | -34.791278 | -55.314361 | <i>Conepatus chinga</i> | Andes skunk | ECOBIO Uruguay |
| 276 | -34.778861 | -55.207750 | <i>Conepatus chinga</i> | Andes skunk | ECOBIO Uruguay |
| 277 | -34.776972 | -54.795667 | <i>Conepatus chinga</i> | Andes skunk | ECOBIO Uruguay |
| 278 | -34.769000 | -54.777306 | <i>Conepatus chinga</i> | Andes skunk | ECOBIO Uruguay |
| 279 | -34.734250 | -55.010722 | <i>Conepatus chinga</i> | Andes skunk | ECOBIO Uruguay |
| 280 | -34.765639 | -54.769667 | <i>Conepatus chinga</i> | Andes skunk | ECOBIO Uruguay |
| 281 | -34.756806 | -54.728194 | <i>Conepatus chinga</i> | Andes skunk | ECOBIO Uruguay |
| 282 | -34.707083 | -54.596250 | <i>Conepatus chinga</i> | Andes skunk | ECOBIO Uruguay |
| 283 | -34.747869 | -54.953281 | <i>Conepatus chinga</i> | Andes skunk | ECOBIO Uruguay |
| 284 | -34.783629 | -54.871264 | <i>Conepatus chinga</i> | Andes skunk | ECOBIO Uruguay |
| 285 | -34.755470 | -54.720629 | <i>Conepatus chinga</i> | Andes skunk | ECOBIO Uruguay |
| 286 | -34.783878 | -54.881275 | <i>Conepatus chinga</i> | Andes skunk | ECOBIO Uruguay |
| 287 | -34.775179 | -55.173088 | <i>Conepatus chinga</i> | Andes skunk | ECOBIO Uruguay |
| 288 | -34.756815 | -54.690659 | <i>Conepatus chinga</i> | Andes skunk | ECOBIO Uruguay |
| 289 | -34.755847 | -54.723119 | <i>Conepatus chinga</i> | Andes skunk | ECOBIO Uruguay |
| 290 | -34.773525 | -55.169361 | <i>Conepatus chinga</i> | Andes skunk | ECOBIO Uruguay |
| 291 | -34.756918 | -54.688611 | <i>Conepatus chinga</i> | Andes skunk | ECOBIO Uruguay |
| 292 | -34.787871 | -55.287832 | <i>Conepatus chinga</i> | Andes skunk | ECOBIO Uruguay |
| 293 | -34.759673 | -55.127080 | <i>Conepatus chinga</i> | Andes skunk | ECOBIO Uruguay |
| 294 | -34.749551 | -55.100887 | <i>Conepatus chinga</i> | Andes skunk | ECOBIO Uruguay |
| 295 | -34.756904 | -54.688761 | <i>Conepatus chinga</i> | Andes skunk | ECOBIO Uruguay |
| 296 | -34.756816 | -54.687341 | <i>Conepatus chinga</i> | Andes skunk | ECOBIO Uruguay |
| 297 | -34.718889 | -54.607606 | <i>Conepatus chinga</i> | Andes skunk | ECOBIO Uruguay |
| 298 | -34.778606 | -55.179218 | <i>Conepatus chinga</i> | Andes skunk | ECOBIO Uruguay |
| 299 | -34.755093 | -54.714751 | <i>Conepatus chinga</i> | Andes skunk | ECOBIO Uruguay |
| 300 | -34.756823 | -54.687498 | <i>Conepatus chinga</i> | Andes skunk | ECOBIO Uruguay |
| 301 | -34.744201 | -55.089574 | <i>Conepatus chinga</i> | Andes skunk | ECOBIO Uruguay |
| 302 | -34.741428 | -55.083311 | <i>Conepatus chinga</i> | Andes skunk | ECOBIO Uruguay |
| 303 | -34.762031 | -54.758588 | <i>Conepatus chinga</i> | Andes skunk | ECOBIO Uruguay |
| 304 | -34.754542 | -54.676728 | <i>Conepatus chinga</i> | Andes skunk | ECOBIO Uruguay |
| 305 | -34.711760 | -54.600830 | <i>Conepatus chinga</i> | Andes skunk | ECOBIO Uruguay |
| 306 | -32.944650 | -53.928319 | <i>Conepatus chinga</i> | Andes skunk | ECOBIO Uruguay |
| 307 | -32.894508 | -54.289219 | <i>Conepatus chinga</i> | Andes skunk | ECOBIO Uruguay |
| 308 | -32.784799 | -54.238532 | <i>Conepatus chinga</i> | Andes skunk | ECOBIO Uruguay |
| 309 | -32.668040 | -53.631802 | <i>Conepatus chinga</i> | Andes skunk | ECOBIO Uruguay |
| 310 | -32.629203 | -53.575146 | <i>Conepatus chinga</i> | Andes skunk | ECOBIO Uruguay |
| 311 | -32.607870 | -53.524391 | <i>Conepatus chinga</i> | Andes skunk | ECOBIO Uruguay |

|     |            |            |                         |                               |                |
|-----|------------|------------|-------------------------|-------------------------------|----------------|
| 312 | -32.599210 | -53.507640 | <i>Conepatus chinga</i> | Andes skunk                   | ECOBIO Uruguay |
| 313 | -32.596442 | -53.503549 | <i>Conepatus chinga</i> | Andes skunk                   | ECOBIO Uruguay |
| 314 | -32.522416 | -53.614394 | <i>Conepatus chinga</i> | Andes skunk                   | ECOBIO Uruguay |
| 315 | -32.513530 | -54.125750 | <i>Conepatus chinga</i> | Andes skunk                   | ECOBIO Uruguay |
| 316 | -32.500570 | -54.122877 | <i>Conepatus chinga</i> | Andes skunk                   | ECOBIO Uruguay |
| 317 | -32.461288 | -53.749126 | <i>Conepatus chinga</i> | Andes skunk                   | ECOBIO Uruguay |
| 318 | -32.460897 | -53.749778 | <i>Conepatus chinga</i> | Andes skunk                   | ECOBIO Uruguay |
| 319 | -32.448447 | -53.822538 | <i>Conepatus chinga</i> | Andes skunk                   | ECOBIO Uruguay |
| 320 | -32.385695 | -54.081594 | <i>Conepatus chinga</i> | Andes skunk                   | ECOBIO Uruguay |
| 321 | -32.371318 | -53.963464 | <i>Conepatus chinga</i> | Andes skunk                   | ECOBIO Uruguay |
| 322 | -32.612309 | -53.533404 | <i>Conepatus chinga</i> | Andes skunk                   | ECOBIO Uruguay |
| 323 | -32.600379 | -53.509378 | <i>Conepatus chinga</i> | Andes skunk                   | ECOBIO Uruguay |
| 324 | -32.379044 | -53.970342 | <i>Conepatus chinga</i> | Andes skunk                   | ECOBIO Uruguay |
| 325 | -32.379786 | -53.970745 | <i>Conepatus chinga</i> | Andes skunk                   | ECOBIO Uruguay |
| 326 | -32.383482 | -54.101254 | <i>Conepatus chinga</i> | Andes skunk                   | ECOBIO Uruguay |
| 327 | -32.385052 | -54.106064 | <i>Conepatus chinga</i> | Andes skunk                   | ECOBIO Uruguay |
| 328 | -32.383178 | -54.100246 | <i>Conepatus chinga</i> | Andes skunk                   | ECOBIO Uruguay |
| 329 | -32.496933 | -53.699146 | <i>Conepatus chinga</i> | Andes skunk                   | ECOBIO Uruguay |
| 330 | -32.623308 | -53.559596 | <i>Conepatus chinga</i> | Andes skunk                   | ECOBIO Uruguay |
| 331 | -32.785176 | -53.765967 | <i>Conepatus chinga</i> | Andes skunk                   | ECOBIO Uruguay |
| 332 | -32.914240 | -54.290222 | <i>Conepatus chinga</i> | Andes skunk                   | ECOBIO Uruguay |
| 333 | -32.906828 | -54.291244 | <i>Conepatus chinga</i> | Andes skunk                   | ECOBIO Uruguay |
| 334 | -32.791861 | -54.240676 | <i>Conepatus chinga</i> | Andes skunk                   | ECOBIO Uruguay |
| 335 | -32.458734 | -53.753531 | <i>Conepatus chinga</i> | Andes skunk                   | ECOBIO Uruguay |
| 336 | -32.527492 | -53.597506 | <i>Conepatus chinga</i> | Andes skunk                   | ECOBIO Uruguay |
| 337 | -32.862735 | -54.272962 | <i>Conepatus chinga</i> | Andes skunk                   | ECOBIO Uruguay |
| 338 | -32.915347 | -54.290463 | <i>Conepatus chinga</i> | Andes skunk                   | ECOBIO Uruguay |
| 339 | -32.739789 | -53.716731 | <i>Conepatus chinga</i> | Andes skunk                   | ECOBIO Uruguay |
| 340 | -33.131437 | -54.388149 | <i>Conepatus chinga</i> | Andes skunk                   | ECOBIO Uruguay |
| 341 | -33.057839 | -54.390036 | <i>Conepatus chinga</i> | Andes skunk                   | ECOBIO Uruguay |
| 342 | -33.057761 | -54.390030 | <i>Conepatus chinga</i> | Andes skunk                   | ECOBIO Uruguay |
| 343 | -33.043667 | -54.390049 | <i>Conepatus chinga</i> | Andes skunk                   | ECOBIO Uruguay |
| 344 | -32.997986 | -54.353526 | <i>Conepatus chinga</i> | Andes skunk                   | ECOBIO Uruguay |
| 345 | -33.048310 | -54.145334 | <i>Conepatus chinga</i> | Andes skunk                   | ECOBIO Uruguay |
| 346 | -33.037186 | -54.133341 | <i>Conepatus chinga</i> | Andes skunk                   | ECOBIO Uruguay |
| 347 | -33.034886 | -54.129980 | <i>Conepatus chinga</i> | Andes skunk                   | ECOBIO Uruguay |
| 348 | -33.430566 | -54.521158 | <i>Dasypus hybridus</i> | Southern long-nosed armadillo | ECOBIO Uruguay |
| 349 | -34.583125 | -54.405408 | <i>Dasypus hybridus</i> | Southern long-nosed armadillo | ECOBIO Uruguay |
| 350 | -33.366385 | -53.860702 | <i>Dasypus hybridus</i> | Southern long-nosed armadillo | ECOBIO Uruguay |
| 351 | -33.638738 | -54.621160 | <i>Dasypus hybridus</i> | Southern                      | ECOBIO Uruguay |

|     |            |            |                              |                               |                |
|-----|------------|------------|------------------------------|-------------------------------|----------------|
|     |            |            |                              | long-nosed armadillo          |                |
| 352 | -34.390453 | -55.284252 | <i>Dasypus hybridus</i>      | Southern long-nosed armadillo | ECOBIO Uruguay |
| 353 | -33.650809 | -54.631783 | <i>Dasypus hybridus</i>      | Southern long-nosed armadillo | ECOBIO Uruguay |
| 354 | -33.910107 | -54.773706 | <i>Dasypus hybridus</i>      | Southern long-nosed armadillo | ECOBIO Uruguay |
| 355 | -33.650120 | -54.630928 | <i>Dasypus hybridus</i>      | Southern long-nosed armadillo | ECOBIO Uruguay |
| 356 | -34.699372 | -54.583929 | <i>Dasypus hybridus</i>      | Southern long-nosed armadillo | ECOBIO Uruguay |
| 357 | -32.457318 | -53.784878 | <i>Dasypus hybridus</i>      | Southern long-nosed armadillo | ECOBIO Uruguay |
| 358 | -32.495522 | -53.718424 | <i>Dasypus hybridus</i>      | Southern long-nosed armadillo | ECOBIO Uruguay |
| 359 | -32.500050 | -53.688623 | <i>Dasypus hybridus</i>      | Southern long-nosed armadillo | ECOBIO Uruguay |
| 360 | -32.456903 | -53.759158 | <i>Dasypus hybridus</i>      | Southern long-nosed armadillo | ECOBIO Uruguay |
| 361 | -33.038505 | -54.135133 | <i>Dasypus hybridus</i>      | Southern long-nosed armadillo | ECOBIO Uruguay |
| 362 | -34.595389 | -54.177389 | <i>Galictis cuja</i>         | Lesser grison                 | ECOBIO Uruguay |
| 363 | -34.352893 | -54.059714 | <i>Galictis cuja</i>         | Lesser grison                 | ECOBIO Uruguay |
| 364 | -34.213734 | -53.920283 | <i>Galictis cuja</i>         | Lesser grison                 | ECOBIO Uruguay |
| 365 | -33.829009 | -53.512387 | <i>Galictis cuja</i>         | Lesser grison                 | ECOBIO Uruguay |
| 366 | -33.828145 | -54.294068 | <i>Galictis cuja</i>         | Lesser grison                 | ECOBIO Uruguay |
| 367 | -34.213780 | -53.921000 | <i>Galictis cuja</i>         | Lesser grison                 | ECOBIO Uruguay |
| 368 | -34.537972 | -54.375806 | <i>Galictis cuja</i>         | Lesser grison                 | ECOBIO Uruguay |
| 369 | -33.572925 | -54.587794 | <i>Galictis cuja</i>         | Lesser grison                 | ECOBIO Uruguay |
| 370 | -34.755778 | -54.704806 | <i>Galictis cuja</i>         | Lesser grison                 | ECOBIO Uruguay |
| 371 | -32.819707 | -53.815893 | <i>Galictis cuja</i>         | Lesser grison                 | ECOBIO Uruguay |
| 372 | -32.713779 | -53.686180 | <i>Galictis cuja</i>         | Lesser grison                 | ECOBIO Uruguay |
| 373 | -32.714506 | -53.687837 | <i>Galictis cuja</i>         | Lesser grison                 | ECOBIO Uruguay |
| 374 | -32.787293 | -53.769983 | <i>Galictis cuja</i>         | Lesser grison                 | ECOBIO Uruguay |
| 375 | -34.366506 | -55.184212 | <i>Lycalopez gymnosercus</i> | Gray pampean fox              | ECOBIO Uruguay |
| 376 | -34.339230 | -55.114860 | <i>Lycalopez gymnosercus</i> | Gray pampean fox              | ECOBIO Uruguay |

|     |            |            |                              |                  |                |
|-----|------------|------------|------------------------------|------------------|----------------|
| 377 | -34.328061 | -55.064545 | <i>Lycalopez gymnosercus</i> | Gray pampean fox | ECOBIO Uruguay |
| 378 | -34.293894 | -54.992801 | <i>Lycalopez gymnosercus</i> | Gray pampean fox | ECOBIO Uruguay |
| 379 | -34.286944 | -54.981111 | <i>Lycalopez gymnosercus</i> | Gray pampean fox | ECOBIO Uruguay |
| 380 | -34.286856 | -54.981233 | <i>Lycalopez gymnosercus</i> | Gray pampean fox | ECOBIO Uruguay |
| 381 | -34.263460 | -54.958880 | <i>Lycalopez gymnosercus</i> | Gray pampean fox | ECOBIO Uruguay |
| 382 | -34.255222 | -54.950583 | <i>Lycalopez gymnosercus</i> | Gray pampean fox | ECOBIO Uruguay |
| 383 | -34.211030 | -54.938520 | <i>Lycalopez gymnosercus</i> | Gray pampean fox | ECOBIO Uruguay |
| 384 | -34.016835 | -54.782402 | <i>Lycalopez gymnosercus</i> | Gray pampean fox | ECOBIO Uruguay |
| 385 | -33.868641 | -54.765961 | <i>Lycalopez gymnosercus</i> | Gray pampean fox | ECOBIO Uruguay |
| 386 | -33.691959 | -54.688021 | <i>Lycalopez gymnosercus</i> | Gray pampean fox | ECOBIO Uruguay |
| 387 | -33.612041 | -54.598677 | <i>Lycalopez gymnosercus</i> | Gray pampean fox | ECOBIO Uruguay |
| 388 | -33.606154 | -54.593834 | <i>Lycalopez gymnosercus</i> | Gray pampean fox | ECOBIO Uruguay |
| 389 | -34.059637 | -54.784010 | <i>Lycalopez gymnosercus</i> | Gray pampean fox | ECOBIO Uruguay |
| 390 | -33.723573 | -54.731290 | <i>Lycalopez gymnosercus</i> | Gray pampean fox | ECOBIO Uruguay |
| 391 | -33.722773 | -54.730187 | <i>Lycalopez gymnosercus</i> | Gray pampean fox | ECOBIO Uruguay |
| 392 | -33.721340 | -54.728206 | <i>Lycalopez gymnosercus</i> | Gray pampean fox | ECOBIO Uruguay |
| 393 | -33.756394 | -54.757502 | <i>Lycalopez gymnosercus</i> | Gray pampean fox | ECOBIO Uruguay |
| 394 | -34.363824 | -55.173272 | <i>Lycalopez gymnosercus</i> | Gray pampean fox | ECOBIO Uruguay |
| 395 | -34.004592 | -54.781777 | <i>Lycalopez gymnosercus</i> | Gray pampean fox | ECOBIO Uruguay |
| 396 | -33.944672 | -54.785960 | <i>Lycalopez gymnosercus</i> | Gray pampean fox | ECOBIO Uruguay |
| 397 | -33.844296 | -54.765720 | <i>Lycalopez gymnosercus</i> | Gray pampean fox | ECOBIO Uruguay |
| 398 | -33.812711 | -54.771987 | <i>Lycalopez gymnosercus</i> | Gray pampean fox | ECOBIO Uruguay |
| 399 | -33.763263 | -54.759337 | <i>Lycalopez gymnosercus</i> | Gray pampean fox | ECOBIO Uruguay |
| 400 | -34.024701 | -54.782407 | <i>Lycalopez gymnosercus</i> | Gray pampean fox | ECOBIO Uruguay |
| 401 | -34.867711 | -54.742580 | <i>Lycalopez gymnosercus</i> | Gray pampean fox | ECOBIO Uruguay |
| 402 | -34.791056 | -55.313250 | <i>Lycalopez gymnosercus</i> | Gray             | ECOBIO Uruguay |

|     |            |            |                              |                     |                |
|-----|------------|------------|------------------------------|---------------------|----------------|
|     |            |            |                              | pampean fox         |                |
| 403 | -34.786444 | -55.259778 | <i>Lycalopez gymnosercus</i> | Gray<br>pampean fox | ECOBIO Uruguay |
| 404 | -34.786163 | -55.268834 | <i>Lycalopez gymnosercus</i> | Gray<br>pampean fox | ECOBIO Uruguay |
| 405 | -34.782083 | -54.826417 | <i>Lycalopez gymnosercus</i> | Gray<br>pampean fox | ECOBIO Uruguay |
| 406 | -34.782081 | -54.827199 | <i>Lycalopez gymnosercus</i> | Gray<br>pampean fox | ECOBIO Uruguay |
| 407 | -34.781139 | -54.805417 | <i>Lycalopez gymnosercus</i> | Gray<br>pampean fox | ECOBIO Uruguay |
| 408 | -34.776193 | -54.793900 | <i>Lycalopez gymnosercus</i> | Gray<br>pampean fox | ECOBIO Uruguay |
| 409 | -34.749444 | -55.100750 | <i>Lycalopez gymnosercus</i> | Gray<br>pampean fox | ECOBIO Uruguay |
| 410 | -34.779130 | -55.197000 | <i>Lycalopez gymnosercus</i> | Gray<br>pampean fox | ECOBIO Uruguay |
| 411 | -34.739278 | -55.078194 | <i>Lycalopez gymnosercus</i> | Gray<br>pampean fox | ECOBIO Uruguay |
| 412 | -34.721111 | -54.609806 | <i>Lycalopez gymnosercus</i> | Gray<br>pampean fox | ECOBIO Uruguay |
| 413 | -34.781111 | -54.805417 | <i>Lycalopez gymnosercus</i> | Gray<br>pampean fox | ECOBIO Uruguay |
| 414 | -34.720133 | -54.608857 | <i>Lycalopez gymnosercus</i> | Gray<br>pampean fox | ECOBIO Uruguay |
| 415 | -34.750365 | -54.658101 | <i>Lycalopez gymnosercus</i> | Gray<br>pampean fox | ECOBIO Uruguay |
| 416 | -34.786969 | -55.284678 | <i>Lycalopez gymnosercus</i> | Gray<br>pampean fox | ECOBIO Uruguay |
| 417 | -32.619655 | -53.550722 | <i>Lycalopez gymnosercus</i> | Gray<br>pampean fox | ECOBIO Uruguay |
| 418 | -32.524150 | -53.608395 | <i>Lycalopez gymnosercus</i> | Gray<br>pampean fox | ECOBIO Uruguay |
| 419 | -32.522331 | -53.614651 | <i>Lycalopez gymnosercus</i> | Gray<br>pampean fox | ECOBIO Uruguay |
| 420 | -32.497909 | -53.695575 | <i>Lycalopez gymnosercus</i> | Gray<br>pampean fox | ECOBIO Uruguay |
| 421 | -32.454581 | -53.803366 | <i>Lycalopez gymnosercus</i> | Gray<br>pampean fox | ECOBIO Uruguay |
| 422 | -32.680014 | -53.645198 | <i>Lycalopez gymnosercus</i> | Gray<br>pampean fox | ECOBIO Uruguay |
| 423 | -32.813150 | -54.236461 | <i>Lycalopez gymnosercus</i> | Gray<br>pampean fox | ECOBIO Uruguay |
| 424 | -32.586453 | -53.464033 | <i>Lycalopez gymnosercus</i> | Gray<br>pampean fox | ECOBIO Uruguay |
| 425 | -33.003854 | -54.082496 | <i>Lycalopez gymnosercus</i> | Gray<br>pampean fox | ECOBIO Uruguay |
| 426 | -33.119327 | -54.193790 | <i>Lycalopez gymnosercus</i> | Gray<br>pampean fox | ECOBIO Uruguay |
| 427 | -34.653411 | -54.523267 | <i>Lycalopez gymnosercus</i> | Gray<br>pampean fox | ECOBIO Uruguay |

|     |            |            |                              |                  |                |
|-----|------------|------------|------------------------------|------------------|----------------|
| 428 | -34.653278 | -54.522917 | <i>Lycalopez gymnosercus</i> | Gray pampean fox | ECOBIO Uruguay |
| 429 | -34.640611 | -54.495583 | <i>Lycalopez gymnosercus</i> | Gray pampean fox | ECOBIO Uruguay |
| 430 | -34.606333 | -54.176500 | <i>Lycalopez gymnosercus</i> | Gray pampean fox | ECOBIO Uruguay |
| 431 | -34.602250 | -54.425667 | <i>Lycalopez gymnosercus</i> | Gray pampean fox | ECOBIO Uruguay |
| 432 | -34.597611 | -54.177361 | <i>Lycalopez gymnosercus</i> | Gray pampean fox | ECOBIO Uruguay |
| 433 | -34.589056 | -54.178556 | <i>Lycalopez gymnosercus</i> | Gray pampean fox | ECOBIO Uruguay |
| 434 | -34.586556 | -54.178972 | <i>Lycalopez gymnosercus</i> | Gray pampean fox | ECOBIO Uruguay |
| 435 | -34.582972 | -54.405417 | <i>Lycalopez gymnosercus</i> | Gray pampean fox | ECOBIO Uruguay |
| 436 | -34.578056 | -54.182250 | <i>Lycalopez gymnosercus</i> | Gray pampean fox | ECOBIO Uruguay |
| 437 | -34.575889 | -54.183778 | <i>Lycalopez gymnosercus</i> | Gray pampean fox | ECOBIO Uruguay |
| 438 | -34.575306 | -54.184000 | <i>Lycalopez gymnosercus</i> | Gray pampean fox | ECOBIO Uruguay |
| 439 | -34.574657 | -54.184553 | <i>Lycalopez gymnosercus</i> | Gray pampean fox | ECOBIO Uruguay |
| 440 | -34.573000 | -54.185583 | <i>Lycalopez gymnosercus</i> | Gray pampean fox | ECOBIO Uruguay |
| 441 | -34.556917 | -54.387028 | <i>Lycalopez gymnosercus</i> | Gray pampean fox | ECOBIO Uruguay |
| 442 | -34.554493 | -54.109893 | <i>Lycalopez gymnosercus</i> | Gray pampean fox | ECOBIO Uruguay |
| 443 | -34.545694 | -54.205972 | <i>Lycalopez gymnosercus</i> | Gray pampean fox | ECOBIO Uruguay |
| 444 | -34.520278 | -54.236833 | <i>Lycalopez gymnosercus</i> | Gray pampean fox | ECOBIO Uruguay |
| 445 | -34.515889 | -54.243556 | <i>Lycalopez gymnosercus</i> | Gray pampean fox | ECOBIO Uruguay |
| 446 | -34.513944 | -54.296361 | <i>Lycalopez gymnosercus</i> | Gray pampean fox | ECOBIO Uruguay |
| 447 | -34.513056 | -54.296944 | <i>Lycalopez gymnosercus</i> | Gray pampean fox | ECOBIO Uruguay |
| 448 | -34.467859 | -54.241991 | <i>Lycalopez gymnosercus</i> | Gray pampean fox | ECOBIO Uruguay |
| 449 | -34.421778 | -54.145555 | <i>Lycalopez gymnosercus</i> | Gray pampean fox | ECOBIO Uruguay |
| 450 | -34.353008 | -54.059775 | <i>Lycalopez gymnosercus</i> | Gray pampean fox | ECOBIO Uruguay |
| 451 | -34.344263 | -54.052499 | <i>Lycalopez gymnosercus</i> | Gray pampean fox | ECOBIO Uruguay |
| 452 | -34.336609 | -54.047459 | <i>Lycalopez gymnosercus</i> | Gray pampean fox | ECOBIO Uruguay |
| 453 | -34.336245 | -54.047339 | <i>Lycalopez gymnosercus</i> | Gray             | ECOBIO Uruguay |

|     |            |            |                              |                     |                |
|-----|------------|------------|------------------------------|---------------------|----------------|
|     |            |            |                              | pampean fox         |                |
| 454 | -34.318831 | -54.035302 | <i>Lycalopez gymnosercus</i> | Gray<br>pampean fox | ECOBIO Uruguay |
| 455 | -34.269034 | -54.000680 | <i>Lycalopez gymnosercus</i> | Gray<br>pampean fox | ECOBIO Uruguay |
| 456 | -34.227941 | -53.966715 | <i>Lycalopez gymnosercus</i> | Gray<br>pampean fox | ECOBIO Uruguay |
| 457 | -34.215638 | -53.930017 | <i>Lycalopez gymnosercus</i> | Gray<br>pampean fox | ECOBIO Uruguay |
| 458 | -34.210721 | -54.315462 | <i>Lycalopez gymnosercus</i> | Gray<br>pampean fox | ECOBIO Uruguay |
| 459 | -34.198882 | -53.782850 | <i>Lycalopez gymnosercus</i> | Gray<br>pampean fox | ECOBIO Uruguay |
| 460 | -34.150262 | -53.716322 | <i>Lycalopez gymnosercus</i> | Gray<br>pampean fox | ECOBIO Uruguay |
| 461 | -34.150187 | -53.716235 | <i>Lycalopez gymnosercus</i> | Gray<br>pampean fox | ECOBIO Uruguay |
| 462 | -34.138182 | -54.286444 | <i>Lycalopez gymnosercus</i> | Gray<br>pampean fox | ECOBIO Uruguay |
| 463 | -34.111703 | -53.668103 | <i>Lycalopez gymnosercus</i> | Gray<br>pampean fox | ECOBIO Uruguay |
| 464 | -34.107061 | -54.285302 | <i>Lycalopez gymnosercus</i> | Gray<br>pampean fox | ECOBIO Uruguay |
| 465 | -34.043272 | -53.591310 | <i>Lycalopez gymnosercus</i> | Gray<br>pampean fox | ECOBIO Uruguay |
| 466 | -34.025121 | -53.582270 | <i>Lycalopez gymnosercus</i> | Gray<br>pampean fox | ECOBIO Uruguay |
| 467 | -34.001932 | -53.571197 | <i>Lycalopez gymnosercus</i> | Gray<br>pampean fox | ECOBIO Uruguay |
| 468 | -34.000949 | -53.570578 | <i>Lycalopez gymnosercus</i> | Gray<br>pampean fox | ECOBIO Uruguay |
| 469 | -33.959413 | -54.325975 | <i>Lycalopez gymnosercus</i> | Gray<br>pampean fox | ECOBIO Uruguay |
| 470 | -33.918871 | -53.532163 | <i>Lycalopez gymnosercus</i> | Gray<br>pampean fox | ECOBIO Uruguay |
| 471 | -33.899153 | -53.524843 | <i>Lycalopez gymnosercus</i> | Gray<br>pampean fox | ECOBIO Uruguay |
| 472 | -33.828732 | -53.512344 | <i>Lycalopez gymnosercus</i> | Gray<br>pampean fox | ECOBIO Uruguay |
| 473 | -33.822390 | -54.292715 | <i>Lycalopez gymnosercus</i> | Gray<br>pampean fox | ECOBIO Uruguay |
| 474 | -33.818850 | -53.508694 | <i>Lycalopez gymnosercus</i> | Gray<br>pampean fox | ECOBIO Uruguay |
| 475 | -33.817556 | -54.291582 | <i>Lycalopez gymnosercus</i> | Gray<br>pampean fox | ECOBIO Uruguay |
| 476 | -33.810469 | -54.289884 | <i>Lycalopez gymnosercus</i> | Gray<br>pampean fox | ECOBIO Uruguay |
| 477 | -33.809304 | -54.289609 | <i>Lycalopez gymnosercus</i> | Gray<br>pampean fox | ECOBIO Uruguay |
| 478 | -33.804829 | -53.502668 | <i>Lycalopez gymnosercus</i> | Gray<br>pampean fox | ECOBIO Uruguay |

|     |            |            |                              |                  |                |
|-----|------------|------------|------------------------------|------------------|----------------|
| 479 | -33.804542 | -53.502518 | <i>Lycalopez gymnosercus</i> | Gray pampean fox | ECOBIO Uruguay |
| 480 | -33.800398 | -54.287486 | <i>Lycalopez gymnosercus</i> | Gray pampean fox | ECOBIO Uruguay |
| 481 | -33.799000 | -53.500000 | <i>Lycalopez gymnosercus</i> | Gray pampean fox | ECOBIO Uruguay |
| 482 | -33.503729 | -54.549624 | <i>Lycalopez gymnosercus</i> | Gray pampean fox | ECOBIO Uruguay |
| 483 | -33.490962 | -54.543870 | <i>Lycalopez gymnosercus</i> | Gray pampean fox | ECOBIO Uruguay |
| 484 | -33.475651 | -53.870545 | <i>Lycalopez gymnosercus</i> | Gray pampean fox | ECOBIO Uruguay |
| 485 | -33.369481 | -53.862082 | <i>Lycalopez gymnosercus</i> | Gray pampean fox | ECOBIO Uruguay |
| 486 | -33.343266 | -54.476955 | <i>Lycalopez gymnosercus</i> | Gray pampean fox | ECOBIO Uruguay |
| 487 | -33.335488 | -53.843844 | <i>Lycalopez gymnosercus</i> | Gray pampean fox | ECOBIO Uruguay |
| 488 | -33.258124 | -54.420364 | <i>Lycalopez gymnosercus</i> | Gray pampean fox | ECOBIO Uruguay |
| 489 | -34.646667 | -54.512472 | <i>Lycalopez gymnosercus</i> | Gray pampean fox | ECOBIO Uruguay |
| 490 | -33.190208 | -54.264014 | <i>Lycalopez gymnosercus</i> | Gray pampean fox | ECOBIO Uruguay |
| 491 | -33.392567 | -54.508094 | <i>Lycalopez gymnosercus</i> | Gray pampean fox | ECOBIO Uruguay |
| 492 | -34.509597 | -54.339590 | <i>Lycalopez gymnosercus</i> | Gray pampean fox | ECOBIO Uruguay |
| 493 | -34.459656 | -54.215583 | <i>Lycalopez gymnosercus</i> | Gray pampean fox | ECOBIO Uruguay |
| 494 | -34.359030 | -54.065962 | <i>Lycalopez gymnosercus</i> | Gray pampean fox | ECOBIO Uruguay |
| 495 | -34.186610 | -53.756175 | <i>Lycalopez gymnosercus</i> | Gray pampean fox | ECOBIO Uruguay |
| 496 | -34.670652 | -54.548615 | <i>Lycalopez gymnosercus</i> | Gray pampean fox | ECOBIO Uruguay |
| 497 | -34.541167 | -54.377762 | <i>Lycalopez gymnosercus</i> | Gray pampean fox | ECOBIO Uruguay |
| 498 | -33.313479 | -54.460972 | <i>Lycalopez gymnosercus</i> | Gray pampean fox | ECOBIO Uruguay |
| 499 | -34.694365 | -54.572452 | <i>Lycalopez gymnosercus</i> | Gray pampean fox | ECOBIO Uruguay |
| 500 | -34.641471 | -54.498223 | <i>Cerdocyon thous</i>       | Forest fox       | ECOBIO Uruguay |
| 501 | -34.641389 | -54.498194 | <i>Cerdocyon thous</i>       | Forest fox       | ECOBIO Uruguay |
| 502 | -34.636194 | -54.481333 | <i>Cerdocyon thous</i>       | Forest fox       | ECOBIO Uruguay |
| 503 | -34.603783 | -54.428194 | <i>Cerdocyon thous</i>       | Forest fox       | ECOBIO Uruguay |
| 504 | -34.582994 | -54.405402 | <i>Cerdocyon thous</i>       | Forest fox       | ECOBIO Uruguay |
| 505 | -34.582371 | -54.179318 | <i>Cerdocyon thous</i>       | Forest fox       | ECOBIO Uruguay |
| 506 | -34.577528 | -54.182722 | <i>Cerdocyon thous</i>       | Forest fox       | ECOBIO Uruguay |
| 507 | -34.574597 | -54.184560 | <i>Cerdocyon thous</i>       | Forest fox       | ECOBIO Uruguay |

|     |            |            |                        |            |                |
|-----|------------|------------|------------------------|------------|----------------|
| 508 | -34.572944 | -54.185611 | <i>Cerdocyon thous</i> | Forest fox | ECOBIO Uruguay |
| 509 | -34.568505 | -54.189070 | <i>Cerdocyon thous</i> | Forest fox | ECOBIO Uruguay |
| 510 | -34.546722 | -54.204139 | <i>Cerdocyon thous</i> | Forest fox | ECOBIO Uruguay |
| 511 | -34.537639 | -54.217917 | <i>Cerdocyon thous</i> | Forest fox | ECOBIO Uruguay |
| 512 | -34.535139 | -54.374222 | <i>Cerdocyon thous</i> | Forest fox | ECOBIO Uruguay |
| 513 | -34.534194 | -54.221861 | <i>Cerdocyon thous</i> | Forest fox | ECOBIO Uruguay |
| 514 | -34.519444 | -54.282778 | <i>Cerdocyon thous</i> | Forest fox | ECOBIO Uruguay |
| 515 | -34.519168 | -54.238043 | <i>Cerdocyon thous</i> | Forest fox | ECOBIO Uruguay |
| 516 | -34.519139 | -54.238139 | <i>Cerdocyon thous</i> | Forest fox | ECOBIO Uruguay |
| 517 | -34.518250 | -54.347694 | <i>Cerdocyon thous</i> | Forest fox | ECOBIO Uruguay |
| 518 | -34.515083 | -54.258583 | <i>Cerdocyon thous</i> | Forest fox | ECOBIO Uruguay |
| 519 | -34.514722 | -54.257639 | <i>Cerdocyon thous</i> | Forest fox | ECOBIO Uruguay |
| 520 | -34.513500 | -54.296611 | <i>Cerdocyon thous</i> | Forest fox | ECOBIO Uruguay |
| 521 | -34.472743 | -54.272136 | <i>Cerdocyon thous</i> | Forest fox | ECOBIO Uruguay |
| 522 | -34.468683 | -54.244618 | <i>Cerdocyon thous</i> | Forest fox | ECOBIO Uruguay |
| 523 | -34.450379 | -54.192222 | <i>Cerdocyon thous</i> | Forest fox | ECOBIO Uruguay |
| 524 | -34.425271 | -54.150204 | <i>Cerdocyon thous</i> | Forest fox | ECOBIO Uruguay |
| 525 | -34.389931 | -54.101361 | <i>Cerdocyon thous</i> | Forest fox | ECOBIO Uruguay |
| 526 | -34.370564 | -54.275430 | <i>Cerdocyon thous</i> | Forest fox | ECOBIO Uruguay |
| 527 | -34.334368 | -54.046080 | <i>Cerdocyon thous</i> | Forest fox | ECOBIO Uruguay |
| 528 | -34.224988 | -53.962386 | <i>Cerdocyon thous</i> | Forest fox | ECOBIO Uruguay |
| 529 | -34.215217 | -53.927931 | <i>Cerdocyon thous</i> | Forest fox | ECOBIO Uruguay |
| 530 | -34.213732 | -53.920806 | <i>Cerdocyon thous</i> | Forest fox | ECOBIO Uruguay |
| 531 | -34.196604 | -53.771115 | <i>Cerdocyon thous</i> | Forest fox | ECOBIO Uruguay |
| 532 | -34.194758 | -53.835436 | <i>Cerdocyon thous</i> | Forest fox | ECOBIO Uruguay |
| 533 | -34.193012 | -53.761603 | <i>Cerdocyon thous</i> | Forest fox | ECOBIO Uruguay |
| 534 | -34.096343 | -53.650588 | <i>Cerdocyon thous</i> | Forest fox | ECOBIO Uruguay |
| 535 | -34.073908 | -53.632296 | <i>Cerdocyon thous</i> | Forest fox | ECOBIO Uruguay |
| 536 | -33.980090 | -53.558737 | <i>Cerdocyon thous</i> | Forest fox | ECOBIO Uruguay |
| 537 | -33.832199 | -54.295112 | <i>Cerdocyon thous</i> | Forest fox | ECOBIO Uruguay |
| 538 | -33.803800 | -53.502208 | <i>Cerdocyon thous</i> | Forest fox | ECOBIO Uruguay |
| 539 | -33.796347 | -53.498880 | <i>Cerdocyon thous</i> | Forest fox | ECOBIO Uruguay |
| 540 | -33.573198 | -54.043381 | <i>Cerdocyon thous</i> | Forest fox | ECOBIO Uruguay |
| 541 | -33.555519 | -54.004197 | <i>Cerdocyon thous</i> | Forest fox | ECOBIO Uruguay |
| 542 | -33.553765 | -54.001001 | <i>Cerdocyon thous</i> | Forest fox | ECOBIO Uruguay |
| 543 | -33.540198 | -53.972795 | <i>Cerdocyon thous</i> | Forest fox | ECOBIO Uruguay |
| 544 | -33.539524 | -53.970431 | <i>Cerdocyon thous</i> | Forest fox | ECOBIO Uruguay |
| 545 | -33.525665 | -53.915327 | <i>Cerdocyon thous</i> | Forest fox | ECOBIO Uruguay |
| 546 | -33.505694 | -53.887238 | <i>Cerdocyon thous</i> | Forest fox | ECOBIO Uruguay |
| 547 | -33.487057 | -53.874296 | <i>Cerdocyon thous</i> | Forest fox | ECOBIO Uruguay |
| 548 | -33.475760 | -53.870624 | <i>Cerdocyon thous</i> | Forest fox | ECOBIO Uruguay |
| 549 | -33.392420 | -53.864399 | <i>Cerdocyon thous</i> | Forest fox | ECOBIO Uruguay |
| 550 | -33.293222 | -54.449303 | <i>Cerdocyon thous</i> | Forest fox | ECOBIO Uruguay |
| 551 | -34.469816 | -54.248925 | <i>Cerdocyon thous</i> | Forest fox | ECOBIO Uruguay |
| 552 | -34.355659 | -54.062377 | <i>Cerdocyon thous</i> | Forest fox | ECOBIO Uruguay |

|     |            |            |                        |            |                |
|-----|------------|------------|------------------------|------------|----------------|
| 553 | -34.355580 | -54.062322 | <i>Cerdocyon thous</i> | Forest fox | ECOBIO Uruguay |
| 554 | -34.226496 | -53.964613 | <i>Cerdocyon thous</i> | Forest fox | ECOBIO Uruguay |
| 555 | -34.518361 | -54.347833 | <i>Cerdocyon thous</i> | Forest fox | ECOBIO Uruguay |
| 556 | -34.562167 | -54.192306 | <i>Cerdocyon thous</i> | Forest fox | ECOBIO Uruguay |
| 557 | -34.574333 | -54.184694 | <i>Cerdocyon thous</i> | Forest fox | ECOBIO Uruguay |
| 558 | -34.575750 | -54.183833 | <i>Cerdocyon thous</i> | Forest fox | ECOBIO Uruguay |
| 559 | -34.585806 | -54.179139 | <i>Cerdocyon thous</i> | Forest fox | ECOBIO Uruguay |
| 560 | -33.363277 | -54.495297 | <i>Cerdocyon thous</i> | Forest fox | ECOBIO Uruguay |
| 561 | -34.194686 | -53.832997 | <i>Cerdocyon thous</i> | Forest fox | ECOBIO Uruguay |
| 562 | -34.087611 | -53.642884 | <i>Cerdocyon thous</i> | Forest fox | ECOBIO Uruguay |
| 563 | -33.807921 | -53.503898 | <i>Cerdocyon thous</i> | Forest fox | ECOBIO Uruguay |
| 564 | -34.472648 | -54.274168 | <i>Cerdocyon thous</i> | Forest fox | ECOBIO Uruguay |
| 565 | -34.087492 | -53.642771 | <i>Cerdocyon thous</i> | Forest fox | ECOBIO Uruguay |
| 566 | -34.596011 | -54.416131 | <i>Cerdocyon thous</i> | Forest fox | ECOBIO Uruguay |
| 567 | -33.319872 | -54.464311 | <i>Cerdocyon thous</i> | Forest fox | ECOBIO Uruguay |
| 568 | -34.631010 | -54.467050 | <i>Cerdocyon thous</i> | Forest fox | ECOBIO Uruguay |
| 569 | -34.393028 | -55.314583 | <i>Cerdocyon thous</i> | Forest fox | ECOBIO Uruguay |
| 570 | -34.363835 | -55.173537 | <i>Cerdocyon thous</i> | Forest fox | ECOBIO Uruguay |
| 571 | -34.337440 | -55.107050 | <i>Cerdocyon thous</i> | Forest fox | ECOBIO Uruguay |
| 572 | -34.293944 | -54.992694 | <i>Cerdocyon thous</i> | Forest fox | ECOBIO Uruguay |
| 573 | -34.241833 | -54.928611 | <i>Cerdocyon thous</i> | Forest fox | ECOBIO Uruguay |
| 574 | -34.117899 | -54.824466 | <i>Cerdocyon thous</i> | Forest fox | ECOBIO Uruguay |
| 575 | -34.060543 | -54.784319 | <i>Cerdocyon thous</i> | Forest fox | ECOBIO Uruguay |
| 576 | -34.008762 | -54.782479 | <i>Cerdocyon thous</i> | Forest fox | ECOBIO Uruguay |
| 577 | -33.867183 | -54.765917 | <i>Cerdocyon thous</i> | Forest fox | ECOBIO Uruguay |
| 578 | -33.714964 | -54.719353 | <i>Cerdocyon thous</i> | Forest fox | ECOBIO Uruguay |
| 579 | -34.106450 | -54.816809 | <i>Cerdocyon thous</i> | Forest fox | ECOBIO Uruguay |
| 580 | -34.088837 | -54.807188 | <i>Cerdocyon thous</i> | Forest fox | ECOBIO Uruguay |
| 581 | -34.256125 | -54.951467 | <i>Cerdocyon thous</i> | Forest fox | ECOBIO Uruguay |
| 582 | -34.368882 | -55.194050 | <i>Cerdocyon thous</i> | Forest fox | ECOBIO Uruguay |
| 583 | -34.015930 | -54.782596 | <i>Cerdocyon thous</i> | Forest fox | ECOBIO Uruguay |
| 584 | -34.760273 | -54.748180 | <i>Cerdocyon thous</i> | Forest fox | ECOBIO Uruguay |
| 585 | -34.754083 | -55.109444 | <i>Cerdocyon thous</i> | Forest fox | ECOBIO Uruguay |
| 586 | -34.749083 | -54.946639 | <i>Cerdocyon thous</i> | Forest fox | ECOBIO Uruguay |
| 587 | -34.748389 | -54.947861 | <i>Cerdocyon thous</i> | Forest fox | ECOBIO Uruguay |
| 588 | -34.734161 | -55.010062 | <i>Cerdocyon thous</i> | Forest fox | ECOBIO Uruguay |
| 589 | -34.777009 | -54.795541 | <i>Cerdocyon thous</i> | Forest fox | ECOBIO Uruguay |
| 590 | -34.707620 | -54.596801 | <i>Cerdocyon thous</i> | Forest fox | ECOBIO Uruguay |
| 591 | -34.755488 | -54.708747 | <i>Cerdocyon thous</i> | Forest fox | ECOBIO Uruguay |
| 592 | -32.833540 | -54.249403 | <i>Cerdocyon thous</i> | Forest fox | ECOBIO Uruguay |
| 593 | -32.778377 | -53.751261 | <i>Cerdocyon thous</i> | Forest fox | ECOBIO Uruguay |
| 594 | -32.727332 | -54.208597 | <i>Cerdocyon thous</i> | Forest fox | ECOBIO Uruguay |
| 595 | -32.723941 | -53.697634 | <i>Cerdocyon thous</i> | Forest fox | ECOBIO Uruguay |
| 596 | -32.693176 | -53.660045 | <i>Cerdocyon thous</i> | Forest fox | ECOBIO Uruguay |
| 597 | -32.630512 | -53.578852 | <i>Cerdocyon thous</i> | Forest fox | ECOBIO Uruguay |

|     |            |            |                             |                       |                |
|-----|------------|------------|-----------------------------|-----------------------|----------------|
| 598 | -32.630317 | -53.578315 | <i>Cerdocyon thous</i>      | Forest fox            | ECOBIO Uruguay |
| 599 | -32.625477 | -53.565102 | <i>Cerdocyon thous</i>      | Forest fox            | ECOBIO Uruguay |
| 600 | -32.618007 | -53.546603 | <i>Cerdocyon thous</i>      | Forest fox            | ECOBIO Uruguay |
| 601 | -32.601362 | -53.511427 | <i>Cerdocyon thous</i>      | Forest fox            | ECOBIO Uruguay |
| 602 | -32.580273 | -53.487116 | <i>Cerdocyon thous</i>      | Forest fox            | ECOBIO Uruguay |
| 603 | -32.495877 | -53.704108 | <i>Cerdocyon thous</i>      | Forest fox            | ECOBIO Uruguay |
| 604 | -32.495865 | -53.704084 | <i>Cerdocyon thous</i>      | Forest fox            | ECOBIO Uruguay |
| 605 | -32.370733 | -53.955022 | <i>Cerdocyon thous</i>      | Forest fox            | ECOBIO Uruguay |
| 606 | -32.765132 | -53.733067 | <i>Cerdocyon thous</i>      | Forest fox            | ECOBIO Uruguay |
| 607 | -32.772171 | -53.734648 | <i>Cerdocyon thous</i>      | Forest fox            | ECOBIO Uruguay |
| 608 | -32.777854 | -53.748979 | <i>Cerdocyon thous</i>      | Forest fox            | ECOBIO Uruguay |
| 609 | -32.526205 | -53.601803 | <i>Cerdocyon thous</i>      | Forest fox            | ECOBIO Uruguay |
| 610 | -32.450044 | -54.111892 | <i>Cerdocyon thous</i>      | Forest fox            | ECOBIO Uruguay |
| 611 | -32.501402 | -54.122629 | <i>Cerdocyon thous</i>      | Forest fox            | ECOBIO Uruguay |
| 612 | -33.149838 | -54.386807 | <i>Cerdocyon thous</i>      | Forest fox            | ECOBIO Uruguay |
| 613 | -33.110386 | -54.384816 | <i>Cerdocyon thous</i>      | Forest fox            | ECOBIO Uruguay |
| 614 | -33.090512 | -54.380101 | <i>Cerdocyon thous</i>      | Forest fox            | ECOBIO Uruguay |
| 615 | -33.106483 | -54.385383 | <i>Cerdocyon thous</i>      | Forest fox            | ECOBIO Uruguay |
| 616 | -33.029296 | -54.388772 | <i>Cerdocyon thous</i>      | Forest fox            | ECOBIO Uruguay |
| 617 | -34.583125 | -54.405408 | <i>Dasypus novemcinctus</i> | Nine-banded armadillo | ECOBIO Uruguay |
| 618 | -33.366385 | -53.860702 | <i>Dasypus novemcinctus</i> | Nine-banded armadillo | ECOBIO Uruguay |
| 619 | -34.516389 | -54.265667 | <i>Dasypus novemcinctus</i> | Nine-banded armadillo | ECOBIO Uruguay |
| 620 | -33.441381 | -53.867239 | <i>Dasypus novemcinctus</i> | Nine-banded armadillo | ECOBIO Uruguay |
| 621 | -33.656041 | -54.638877 | <i>Dasypus novemcinctus</i> | Nine-banded armadillo | ECOBIO Uruguay |
| 622 | -33.952916 | -54.788576 | <i>Dasypus novemcinctus</i> | Nine-banded armadillo | ECOBIO Uruguay |
| 623 | -33.910107 | -54.773706 | <i>Dasypus novemcinctus</i> | Nine-banded armadillo | ECOBIO Uruguay |
| 624 | -33.650120 | -54.630928 | <i>Dasypus novemcinctus</i> | Nine-banded armadillo | ECOBIO Uruguay |
| 625 | -34.390453 | -55.284252 | <i>Dasypus novemcinctus</i> | Nine-banded armadillo | ECOBIO Uruguay |
| 626 | -34.199000 | -54.845583 | <i>Dasypus novemcinctus</i> | Nine-banded armadillo | ECOBIO Uruguay |
| 627 | -34.699372 | -54.583929 | <i>Dasypus novemcinctus</i> | Nine-banded armadillo | ECOBIO Uruguay |
| 628 | -34.785917 | -55.334278 | <i>Dasypus novemcinctus</i> | Nine-banded armadillo | ECOBIO Uruguay |
| 629 | -34.733220 | -55.001891 | <i>Dasypus novemcinctus</i> | Nine-banded armadillo | ECOBIO Uruguay |
| 630 | -32.637451 | -53.604330 | <i>Dasypus novemcinctus</i> | Nine-banded armadillo | ECOBIO Uruguay |
| 631 | -32.810010 | -53.801898 | <i>Dasypus novemcinctus</i> | Nine-banded           | ECOBIO Uruguay |

|     |            |            |                             |                        |                |
|-----|------------|------------|-----------------------------|------------------------|----------------|
|     |            |            |                             | armadillo              |                |
| 632 | -33.038505 | -54.135133 | <i>Dasypus novemcinctus</i> | Nine-banded armadillo  | ECOBIO Uruguay |
| 633 | -34.662417 | -54.537778 | <i>Leopardus geoffroyi</i>  | Geoffroy's cat         | ECOBIO Uruguay |
| 634 | -34.558139 | -54.194917 | <i>Leopardus geoffroyi</i>  | Geoffroy's cat         | ECOBIO Uruguay |
| 635 | -34.421634 | -54.145360 | <i>Leopardus geoffroyi</i>  | Geoffroy's cat         | ECOBIO Uruguay |
| 636 | -34.219586 | -54.314626 | <i>Leopardus geoffroyi</i>  | Geoffroy's cat         | ECOBIO Uruguay |
| 637 | -33.898738 | -54.311256 | <i>Leopardus geoffroyi</i>  | Geoffroy's cat         | ECOBIO Uruguay |
| 638 | -34.211667 | -53.910490 | <i>Leopardus geoffroyi</i>  | Geoffroy's cat         | ECOBIO Uruguay |
| 639 | -34.199847 | -54.936041 | <i>Leopardus geoffroyi</i>  | Geoffroy's cat         | ECOBIO Uruguay |
| 640 | -34.199505 | -54.936000 | <i>Leopardus geoffroyi</i>  | Geoffroy's cat         | ECOBIO Uruguay |
| 641 | -34.781833 | -54.791444 | <i>Leopardus geoffroyi</i>  | Geoffroy's cat         | ECOBIO Uruguay |
| 642 | -34.781750 | -54.819333 | <i>Leopardus geoffroyi</i>  | Geoffroy's cat         | ECOBIO Uruguay |
| 643 | -34.791007 | -55.238156 | <i>Leopardus geoffroyi</i>  | Geoffroy's cat         | ECOBIO Uruguay |
| 644 | -34.739028 | -54.982639 | <i>Leopardus geoffroyi</i>  | Geoffroy's cat         | ECOBIO Uruguay |
| 645 | -32.450192 | -53.820907 | <i>Leopardus geoffroyi</i>  | Geoffroy's cat         | ECOBIO Uruguay |
| 646 | -32.526324 | -53.601549 | <i>Leopardus geoffroyi</i>  | Geoffroy's cat         | ECOBIO Uruguay |
| 647 | -34.778250 | -55.349750 | <i>Leopardus wiedii</i>     | Margay                 | ECOBIO Uruguay |
| 648 | -34.783641 | -55.339115 | <i>Leopardus wiedii</i>     | Margay                 | ECOBIO Uruguay |
| 649 | -34.783330 | -55.339722 | <i>Leopardus wiedii</i>     | Margay                 | ECOBIO Uruguay |
| 650 | -34.375861 | -54.084802 | <i>Lontra longicaudis</i>   | Neotropical otter      | ECOBIO Uruguay |
| 651 | -34.360163 | -54.067372 | <i>Lontra longicaudis</i>   | Neotropical otter      | ECOBIO Uruguay |
| 652 | -34.783194 | -54.859444 | <i>Lontra longicaudis</i>   | Neotropical otter      | ECOBIO Uruguay |
| 653 | -32.600526 | -53.509818 | <i>Lontra longicaudis</i>   | Neotropical otter      | ECOBIO Uruguay |
| 654 | -34.669722 | -54.547487 | <i>Procyon cancrivorus</i>  | South American raccoon | ECOBIO Uruguay |
| 655 | -34.635856 | -54.480037 | <i>Procyon cancrivorus</i>  | South American raccoon | ECOBIO Uruguay |
| 656 | -34.614889 | -54.175556 | <i>Procyon cancrivorus</i>  | South American raccoon | ECOBIO Uruguay |
| 657 | -34.593417 | -54.177861 | <i>Procyon cancrivorus</i>  | South American raccoon | ECOBIO Uruguay |
| 658 | -34.527192 | -54.229287 | <i>Procyon cancrivorus</i>  | South American raccoon | ECOBIO Uruguay |
| 659 | -34.450428 | -54.192300 | <i>Procyon cancrivorus</i>  | South American raccoon | ECOBIO Uruguay |
| 660 | -34.318744 | -54.035345 | <i>Procyon cancrivorus</i>  | South American         | ECOBIO Uruguay |

|     |            |            |                            |                        |                |
|-----|------------|------------|----------------------------|------------------------|----------------|
|     |            |            |                            | raccoon                |                |
| 661 | -34.297992 | -54.020789 | <i>Procyon cancrivorus</i> | South American raccoon | ECOBIO Uruguay |
| 662 | -34.297859 | -54.020792 | <i>Procyon cancrivorus</i> | South American raccoon | ECOBIO Uruguay |
| 663 | -34.213701 | -53.920149 | <i>Procyon cancrivorus</i> | South American raccoon | ECOBIO Uruguay |
| 664 | -33.842477 | -53.516414 | <i>Procyon cancrivorus</i> | South American raccoon | ECOBIO Uruguay |
| 665 | -33.838170 | -53.515273 | <i>Procyon cancrivorus</i> | South American raccoon | ECOBIO Uruguay |
| 666 | -33.795610 | -53.498666 | <i>Procyon cancrivorus</i> | South American raccoon | ECOBIO Uruguay |
| 667 | -33.548665 | -53.991752 | <i>Procyon cancrivorus</i> | South American raccoon | ECOBIO Uruguay |
| 668 | -33.540629 | -53.974777 | <i>Procyon cancrivorus</i> | South American raccoon | ECOBIO Uruguay |
| 669 | -34.508055 | -54.338284 | <i>Procyon cancrivorus</i> | South American raccoon | ECOBIO Uruguay |
| 670 | -34.314917 | -55.028972 | <i>Procyon cancrivorus</i> | South American raccoon | ECOBIO Uruguay |
| 671 | -34.314873 | -55.028736 | <i>Procyon cancrivorus</i> | South American raccoon | ECOBIO Uruguay |
| 672 | -34.320713 | -55.050019 | <i>Procyon cancrivorus</i> | South American raccoon | ECOBIO Uruguay |
| 673 | -33.955098 | -54.789029 | <i>Procyon cancrivorus</i> | South American raccoon | ECOBIO Uruguay |
| 674 | -34.288592 | -54.983924 | <i>Procyon cancrivorus</i> | South American raccoon | ECOBIO Uruguay |
| 675 | -34.754389 | -55.109667 | <i>Procyon cancrivorus</i> | South American raccoon | ECOBIO Uruguay |
| 676 | -34.747035 | -54.643661 | <i>Procyon cancrivorus</i> | South American raccoon | ECOBIO Uruguay |
| 677 | -34.832250 | -54.633583 | <i>Procyon cancrivorus</i> | South American         | ECOBIO Uruguay |

|     |            |            |                            |                        |                |
|-----|------------|------------|----------------------------|------------------------|----------------|
|     |            |            |                            | raccoon                |                |
| 678 | -34.734134 | -55.010055 | <i>Procyon cancrivorus</i> | South American raccoon | ECOBIO Uruguay |
| 679 | -34.787465 | -55.327200 | <i>Procyon cancrivorus</i> | South American raccoon | ECOBIO Uruguay |
| 680 | -32.658629 | -53.624402 | <i>Procyon cancrivorus</i> | South American raccoon | ECOBIO Uruguay |
| 681 | -32.581976 | -53.480609 | <i>Procyon cancrivorus</i> | South American raccoon | ECOBIO Uruguay |
| 682 | -32.564904 | -53.516296 | <i>Procyon cancrivorus</i> | South American raccoon | ECOBIO Uruguay |
| 683 | -32.416565 | -53.869736 | <i>Procyon cancrivorus</i> | South American raccoon | ECOBIO Uruguay |
| 684 | -32.380725 | -53.990118 | <i>Procyon cancrivorus</i> | South American raccoon | ECOBIO Uruguay |
| 685 | -32.670230 | -53.634047 | <i>Procyon cancrivorus</i> | South American raccoon | ECOBIO Uruguay |

## **R Modeling script**

## This script was based on the following blog <https://modtools.wordpress.com>.

```
library(fuzzySim)
library(modEvA)
```

## Import the table with grids of species presence/absence and predictor variables

```
df <- read.csv("table.csv")
```

```
mod <- multGLM(df, sp.cols, var.cols, step = TRUE, corSelect = TRUE, FDR = TRUE, trim = TRUE, Y = TRUE, P = TRUE, Favourability = TRUE)
```

```
# summary of the model with the variables that entered
summary(mod$models)
```

```
# Wald test estimate for the variables that entered the model
library(survey)
```

```
anova(mods$models[[1]])
regTermTest(mods$models[[1]], "variable", method = "Wald") # repeat as many variables as variables entered in the model.
```

## **## model evaluation**

```
eval_mod <- multModEv(models = mod$models[1], thresh = "preval", measures = c("AUC", "CCR", "Sensitivity", "TSS", "kappa", "Specificity", "UPR", "OPR"))
```

## **## Export model predictions to visualize in QGIS software**

```
library(foreign)
```

```
mod_pred <- mod$predictions
```

```
write.dbf(mod_pred, file = "mod.dbf")
```
